# Supplementary material for: Integrated Early Warning Surveillance: Achilles′ Heel of One Health?
Source: MDPI journal article supplement (doi:10.3390/microorganisms8010084), 2020-01-08

# Indicators for Early Warning and Risk Assessment - HUMAN

Contact information

**\*Required**

1. Email address \*

---

## MediLabSecure (MLS) One Health Project - Surveillance of Arbovirus infections

---

### Purpose of the survey

---

Goal of this survey is to collect information on important indicators for risk assessment and early warning of arboviruses of relevance in the countries of the MLS Network, focusing on IF and HOW such information are collected at country level.

Please, complete each part of the questionnaire in the most accurate way possible.  
For any further clarification, feel free to contact us at [laura.amato@iss.it](mailto:laura.amato@iss.it)

Many thanks in advance for your time and consideration.

The Public Health Work Package of MLS

### Structure of the questionnaire

---

The present questionnaire focuses on 7 relevant pathogens (namely Chikungunya virus, Crimean-Congo Haemorrhagic fever virus, Dengue fever virus, Yellow fever virus, Rift Valley fever virus, West Nile virus, Zika virus).

Each sector involved in the surveillance activities of the above pathogens (vector, human, animal) collects data in accordance with respective surveillance priorities. You are kindly asked to fill in this questionnaire that is specifically related to your field of expertise and sector of activity.

Each section is dedicated to one pathogen. At the beginning of each section, a question asking on the relevance of the pathogen for your country lets you provide information on the pathogen or skip to the next one.

Good luck and thank you for your support!

## Human

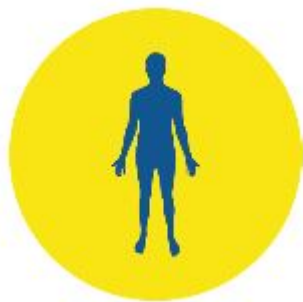

2. Country \*

---

3. Family name \*

---

4. Given name \*

---

5. Name of your Institution \*

---

6. Name of your Laboratory \*

---

7. Of which MediLabSecure networks is your laboratory part of? \*

*Tick all that apply.*

- ☐ Human Virology
- ☐ Animal Virology
- ☐ Medical Entomology
- ☐ Human Public Health
- ☐ Animal Public Health
- ☐ Other: \_\_\_\_\_

8. Family name, given name and affiliation of other contributors to the compilation of the survey, if any

---

---

---

---

---

## Public Health - General Section

**9. Is your country collecting data on POPULATION DENSITY and at which level? \****Tick all that apply.*

- ☐ NO
- ☐ YES - National aggregated
- ☐ YES - Regional aggregated
- ☐ YES - Local or municipal
- ☐ I don't know
- ☐ Other: \_\_\_\_\_

**10. If yes, where are the collected data on POPULATION DENSITY stored?***Tick all that apply.*

- ☐ Digitalized national database interoperable or integrated with other sectors' databases
- ☐ Digitalized national database
- ☐ Non digitalized national database
- ☐ Local or regional database
- ☐ I don't know
- ☐ Other: \_\_\_\_\_

**11. Is your country collecting data on POPULATION AGE DISTRIBUTION and at which level? \****Tick all that apply.*

- ☐ NO
- ☐ YES - National aggregated
- ☐ YES - Regional aggregated
- ☐ YES - Local or municipal
- ☐ I don't know
- ☐ Other: \_\_\_\_\_

**12. If yes, where are the collected data on POPULATION AGE DISTRIBUTION stored?***Tick all that apply.*

- ☐ Digitalized national database interoperable or integrated with other sectors' databases
- ☐ Digitalized national database
- ☐ Non digitalized national database
- ☐ Local or regional database
- ☐ I don't know
- ☐ Other: \_\_\_\_\_

**13. Has your office access to any GLOBAL PUBLIC DATASET related to humans? \****Mark only one oval.*

- ☐ Yes
- ☐ No
- ☐ I don't know
- ☐ Other: \_\_\_\_\_

14. If yes, which one/ones? Are you using it/them for which purpose?

---



---



---



---



---

## Chikungunya virus

15. Is Chikungunya virus a pathogen of relevance for your country? (A relevant pathogen could be an endemic or epidemic pathogen in the country, or an emerging pathogen not yet identified in the country) \*

Mark only one oval.

- ☐ YES
- ☐ NO      Skip to question 20.
- ☐ Other: \_\_\_\_\_

## Chikungunya virus

16. Is your country collecting data on DISEASE FREQUENCY or OCCURRENCE and at which level? \*

Tick all that apply.

|                                                                                    | No                       | YES (national aggregated) | YES (regional aggregated) | YES (local or GPS)       | Other                    | I don't know             |
|------------------------------------------------------------------------------------|--------------------------|---------------------------|---------------------------|--------------------------|--------------------------|--------------------------|
| New notified cases / outbreaks (according to National case definition) per year    | <input type="checkbox"/> | <input type="checkbox"/>  | <input type="checkbox"/>  | <input type="checkbox"/> | <input type="checkbox"/> | <input type="checkbox"/> |
| Number confirmed laboratory cases (according to National case definition) per year | <input type="checkbox"/> | <input type="checkbox"/>  | <input type="checkbox"/>  | <input type="checkbox"/> | <input type="checkbox"/> | <input type="checkbox"/> |
| Persons with detected antibodies / tested persons (SERO-PREVALENCE)                | <input type="checkbox"/> | <input type="checkbox"/>  | <input type="checkbox"/>  | <input type="checkbox"/> | <input type="checkbox"/> | <input type="checkbox"/> |

17. If you selected "other" in the previous question, please specify here below

---

**18. If yes, where are the collected data stored?***Tick all that apply.*

|                                                                                    | Digitalized national database interoperable or integrated with other sectors' databases | Digitalized national database | Non digitalized national database | Local or regional database | Other                    | I don't know             | Non applicable           |
|------------------------------------------------------------------------------------|-----------------------------------------------------------------------------------------|-------------------------------|-----------------------------------|----------------------------|--------------------------|--------------------------|--------------------------|
| New notified cases / outbreaks (according to National case definition) per year    | <input type="checkbox"/>                                                                | <input type="checkbox"/>      | <input type="checkbox"/>          | <input type="checkbox"/>   | <input type="checkbox"/> | <input type="checkbox"/> | <input type="checkbox"/> |
| Number confirmed laboratory cases (according to National case definition) per year | <input type="checkbox"/>                                                                | <input type="checkbox"/>      | <input type="checkbox"/>          | <input type="checkbox"/>   | <input type="checkbox"/> | <input type="checkbox"/> | <input type="checkbox"/> |
| Persons with detected antibodies / tested persons (SERO- PREVALENCE)               | <input type="checkbox"/>                                                                | <input type="checkbox"/>      | <input type="checkbox"/>          | <input type="checkbox"/>   | <input type="checkbox"/> | <input type="checkbox"/> | <input type="checkbox"/> |

**19. If you selected "other" in the previous question, please specify here below**


---

**20. Is your country collecting ANY OTHER RELEVANT INDICATOR not mentioned above? If yes, could you specify? \***


---



---



---



---



---

**Crimean-Congo Haemorrhagic fever virus****21. Is Crimean-Congo Haemorrhagic fever virus a pathogen of relevance for your country? (A relevant pathogen could be an endemic or epidemic pathogen in the country, or an emerging pathogen not yet identified in the country) \****Mark only one oval.*☐ YES☐ NO *Skip to question 26.*☐ Other: 

---

**Crimean-Congo Haemorrhagic fever virus**

**22. Is your country collecting data on DISEASE FREQUENCY or OCCURRENCE and at which level? \***

*Tick all that apply.*

|                                                                                    | No                       | YES (national aggregated) | YES (regional aggregated) | YES (local or GPS)       | Other                    | I don't know             |
|------------------------------------------------------------------------------------|--------------------------|---------------------------|---------------------------|--------------------------|--------------------------|--------------------------|
| New notified cases / outbreaks (according to National case definition) per year    | <input type="checkbox"/> | <input type="checkbox"/>  | <input type="checkbox"/>  | <input type="checkbox"/> | <input type="checkbox"/> | <input type="checkbox"/> |
| Number confirmed laboratory cases (according to National case definition) per year | <input type="checkbox"/> | <input type="checkbox"/>  | <input type="checkbox"/>  | <input type="checkbox"/> | <input type="checkbox"/> | <input type="checkbox"/> |
| Persons with detected antibodies / tested persons (SERO-PREVALENCE)                | <input type="checkbox"/> | <input type="checkbox"/>  | <input type="checkbox"/>  | <input type="checkbox"/> | <input type="checkbox"/> | <input type="checkbox"/> |

**23. If you selected "other" in the previous question, please specify here below**

---

**24. If yes, where are the collected data stored?**

*Tick all that apply.*

|                                                                                    | Digitalized national database interoperable or integrated with other sectors' databases | Digitalized national database | Non digitalized national database | Local or regional database | Other                    | I don't know             | Non applicable           |
|------------------------------------------------------------------------------------|-----------------------------------------------------------------------------------------|-------------------------------|-----------------------------------|----------------------------|--------------------------|--------------------------|--------------------------|
| New notified cases / outbreaks (according to National case definition) per year    | <input type="checkbox"/>                                                                | <input type="checkbox"/>      | <input type="checkbox"/>          | <input type="checkbox"/>   | <input type="checkbox"/> | <input type="checkbox"/> | <input type="checkbox"/> |
| Number confirmed laboratory cases (according to National case definition) per year | <input type="checkbox"/>                                                                | <input type="checkbox"/>      | <input type="checkbox"/>          | <input type="checkbox"/>   | <input type="checkbox"/> | <input type="checkbox"/> | <input type="checkbox"/> |
| Persons with detected antibodies / tested persons (SERO-PREVALENCE)                | <input type="checkbox"/>                                                                | <input type="checkbox"/>      | <input type="checkbox"/>          | <input type="checkbox"/>   | <input type="checkbox"/> | <input type="checkbox"/> | <input type="checkbox"/> |

**25. If you selected "other" in the previous question, please specify here below**

---

26. Is your country collecting ANY OTHER RELEVANT INDICATOR not mentioned above? If yes, could you specify? \*

---



---



---



---



---

## Dengue virus

27. Is Dengue virus a pathogen of relevance for your country? (A relevant pathogen could be an endemic or epidemic pathogen in the country, or an emerging pathogen not yet identified in the country) \*

Mark only one oval.

- ☐ YES
- ☐ NO      Skip to question 37.
- ☐ Other: \_\_\_\_\_

## Dengue virus

28. Is your country collecting data on DISEASE FREQUENCY or OCCURRENCE and at which level? \*

Tick all that apply.

|                                                                                    | No                       | YES (national aggregated) | YES (regional aggregated) | YES (local or GPS)       | Other                    | I don't know             |
|------------------------------------------------------------------------------------|--------------------------|---------------------------|---------------------------|--------------------------|--------------------------|--------------------------|
| New notified cases / outbreaks (according to National case definition) per year    | <input type="checkbox"/> | <input type="checkbox"/>  | <input type="checkbox"/>  | <input type="checkbox"/> | <input type="checkbox"/> | <input type="checkbox"/> |
| Number confirmed laboratory cases (according to National case definition) per year | <input type="checkbox"/> | <input type="checkbox"/>  | <input type="checkbox"/>  | <input type="checkbox"/> | <input type="checkbox"/> | <input type="checkbox"/> |
| Persons with detected antibodies / tested persons (SERO- PREVALENCE)               | <input type="checkbox"/> | <input type="checkbox"/>  | <input type="checkbox"/>  | <input type="checkbox"/> | <input type="checkbox"/> | <input type="checkbox"/> |

29. If you selected "other" in the previous question, please specify here below

---

**30. If yes, where are the collected data stored?***Tick all that apply.*

|                                                                                    | Digitalized national database interoperable or integrated with other sectors' databases | Digitalized national database | Non digitalized national database | Local or regional database | Other                    | I don't know             | Non applicable           |
|------------------------------------------------------------------------------------|-----------------------------------------------------------------------------------------|-------------------------------|-----------------------------------|----------------------------|--------------------------|--------------------------|--------------------------|
| New notified cases / outbreaks (according to National case definition) per year    | <input type="checkbox"/>                                                                | <input type="checkbox"/>      | <input type="checkbox"/>          | <input type="checkbox"/>   | <input type="checkbox"/> | <input type="checkbox"/> | <input type="checkbox"/> |
| Number confirmed laboratory cases (according to National case definition) per year | <input type="checkbox"/>                                                                | <input type="checkbox"/>      | <input type="checkbox"/>          | <input type="checkbox"/>   | <input type="checkbox"/> | <input type="checkbox"/> | <input type="checkbox"/> |
| Persons with detected antibodies / tested persons (SERO- PREVALENCE)               | <input type="checkbox"/>                                                                | <input type="checkbox"/>      | <input type="checkbox"/>          | <input type="checkbox"/>   | <input type="checkbox"/> | <input type="checkbox"/> | <input type="checkbox"/> |

**31. If you selected "other" in the previous question, please specify here below**


---

**32. Is your country performing ROUTINELY VACCINATION FOR DENGUE? \****Tick all that apply.*

- ☐ YES
- ☐ NOT AT ALL
- ☐ NOT ROUTINELY / OTHER
- ☐ I DON'T KNOW

**33. If you selected "NOT ROUTINELY / OTHER" in the previous question, could you please specify here below?**


---

**34. Is your country following any specific policy / guidelines regarding the vaccination? Could you please specify or report here below the link?**


---



---



---



---



---



35. If "YES" or "NOT ROUTINELY / OTHER", is your country collecting data on number of vaccinated per year or vaccination coverage, and at which level?

*Tick all that apply.*

- ☐ NO
- ☐ YES - National aggregated
- ☐ YES - Regional aggregated
- ☐ YES - Local or municipal
- ☐ I don't know
- ☐ Other: \_\_\_\_\_

36. If "YES" or "NOT ROUTINELY / OTHER", where are the collected data on VACCINATION stored?

*Tick all that apply.*

- ☐ Digitalized national database interoperable or integrated with other sectors' databases
- ☐ Digitalized national database
- ☐ Non digitalized national database
- ☐ Local or regional database
- ☐ I don't know
- ☐ Other: \_\_\_\_\_

37. Is your country collecting ANY OTHER RELEVANT INDICATOR not mentioned above? If yes, could you specify? \*

---

---

---

---

---

## Yellow Fever virus

38. Is Yellow Fever virus a pathogen of relevance for your country? (A relevant pathogen could be an endemic or epidemic pathogen in the country, or an emerging pathogen not yet identified in the country) \*

*Mark only one oval.*

- ☐ YES
- ☐ NO      *Skip to question 47.*
- ☐ Other: \_\_\_\_\_

## Yellow fever virus

**39. Is your country collecting data on DISEASE FREQUENCY or OCCURRENCE and at which level? \***

*Tick all that apply.*

|                                                                                    | No                       | YES (national aggregated) | YES (regional aggregated) | YES (local or GPS)       | Other                    | I don't know             |
|------------------------------------------------------------------------------------|--------------------------|---------------------------|---------------------------|--------------------------|--------------------------|--------------------------|
| New notified cases / outbreaks (according to National case definition) per year    | <input type="checkbox"/> | <input type="checkbox"/>  | <input type="checkbox"/>  | <input type="checkbox"/> | <input type="checkbox"/> | <input type="checkbox"/> |
| Number confirmed laboratory cases (according to National case definition) per year | <input type="checkbox"/> | <input type="checkbox"/>  | <input type="checkbox"/>  | <input type="checkbox"/> | <input type="checkbox"/> | <input type="checkbox"/> |
| Persons with detected antibodies / tested persons (SERO-PREVALENCE)                | <input type="checkbox"/> | <input type="checkbox"/>  | <input type="checkbox"/>  | <input type="checkbox"/> | <input type="checkbox"/> | <input type="checkbox"/> |

**40. If you selected "other" in the previous question, please specify here below**

---

**41. If yes, where are the collected data stored?**

*Tick all that apply.*

|                                                                                    | Digitalized national database interoperable or integrated with other sectors' databases | Digitalized national database | Non digitalized national database | Local or regional database | Other                    | I don't know             | Non applicable           |
|------------------------------------------------------------------------------------|-----------------------------------------------------------------------------------------|-------------------------------|-----------------------------------|----------------------------|--------------------------|--------------------------|--------------------------|
| New notified cases / outbreaks (according to National case definition) per year    | <input type="checkbox"/>                                                                | <input type="checkbox"/>      | <input type="checkbox"/>          | <input type="checkbox"/>   | <input type="checkbox"/> | <input type="checkbox"/> | <input type="checkbox"/> |
| Number confirmed laboratory cases (according to National case definition) per year | <input type="checkbox"/>                                                                | <input type="checkbox"/>      | <input type="checkbox"/>          | <input type="checkbox"/>   | <input type="checkbox"/> | <input type="checkbox"/> | <input type="checkbox"/> |
| Persons with detected antibodies / tested persons (SERO-PREVALENCE)                | <input type="checkbox"/>                                                                | <input type="checkbox"/>      | <input type="checkbox"/>          | <input type="checkbox"/>   | <input type="checkbox"/> | <input type="checkbox"/> | <input type="checkbox"/> |

**42. If you selected "other" in the previous question, please specify here below**

---

**43. Is your country performing ROUTINELY VACCINATION FOR YELLOW FEVER? \****Tick all that apply.*

- ☐ YES
- ☐ NOT AT ALL
- ☐ NOT ROUTINELY / OTHER
- ☐ I DON'T KNOW

**44. If you selected "NOT ROUTINELY / OTHER" in the previous question, could you please specify here below?**

---

**45. If "YES" or "NOT ROUTINELY / OTHER", is your country collecting data on number of vaccinated per year or vaccination coverage, and at which level?***Tick all that apply.*

- ☐ NO
- ☐ YES - National aggregated
- ☐ YES - Regional aggregated
- ☐ YES - Local or municipal
- ☐ I don't know
- ☐ Other: 

---

**46. If "YES" or "NOT ROUTINELY / OTHER", where are the collected data on VACCINATION stored?***Tick all that apply.*

- ☐ Digitalized national database interoperable or integrated with other sectors' databases
- ☐ Digitalized national database
- ☐ Non digitalized national database
- ☐ Local or regional database
- ☐ I don't know
- ☐ Other: 

---

**47. Is your country collecting ANY OTHER RELEVANT INDICATOR not mentioned above? If yes, could you specify? \***

---

---

---

---

---

**Rift Valley Fever virus**

**48. Is Rift Valley Fever virus a pathogen of relevance for your country? (A relevant pathogen could be an endemic or epidemic pathogen in the country, or an emerging pathogen not yet identified in the country) \***

*Mark only one oval.*

- ☐ YES
- ☐ NO      *Skip to question 53.*
- ☐ Other: \_\_\_\_\_

## Rift Valley Fever virus

**49. Is your country collecting data on DISEASE FREQUENCY or OCCURRENCE and at which level? \***

*Tick all that apply.*

|                                                                                    | No                       | YES (national aggregated) | YES (regional aggregated) | YES (local or GPS)       | Other                    | I don't know             |
|------------------------------------------------------------------------------------|--------------------------|---------------------------|---------------------------|--------------------------|--------------------------|--------------------------|
| New notified cases / outbreaks (according to National case definition) per year    | <input type="checkbox"/> | <input type="checkbox"/>  | <input type="checkbox"/>  | <input type="checkbox"/> | <input type="checkbox"/> | <input type="checkbox"/> |
| Number confirmed laboratory cases (according to National case definition) per year | <input type="checkbox"/> | <input type="checkbox"/>  | <input type="checkbox"/>  | <input type="checkbox"/> | <input type="checkbox"/> | <input type="checkbox"/> |
| Persons with detected antibodies / tested persons (SERO-PREVALENCE)                | <input type="checkbox"/> | <input type="checkbox"/>  | <input type="checkbox"/>  | <input type="checkbox"/> | <input type="checkbox"/> | <input type="checkbox"/> |

**50. If you selected "other" in the previous question, please specify here below**

\_\_\_\_\_

**51. If yes, where are the collected data stored?***Tick all that apply.*

|                                                                                    | Digitalized national database interoperable or integrated with other sectors' databases | Digitalized national database | Non digitalized national database | Local or regional database | Other                    | I don't know             | Non applicable           |
|------------------------------------------------------------------------------------|-----------------------------------------------------------------------------------------|-------------------------------|-----------------------------------|----------------------------|--------------------------|--------------------------|--------------------------|
| New notified cases / outbreaks (according to National case definition) per year    | <input type="checkbox"/>                                                                | <input type="checkbox"/>      | <input type="checkbox"/>          | <input type="checkbox"/>   | <input type="checkbox"/> | <input type="checkbox"/> | <input type="checkbox"/> |
| Number confirmed laboratory cases (according to National case definition) per year | <input type="checkbox"/>                                                                | <input type="checkbox"/>      | <input type="checkbox"/>          | <input type="checkbox"/>   | <input type="checkbox"/> | <input type="checkbox"/> | <input type="checkbox"/> |
| Persons with detected antibodies / tested persons (SERO- PREVALENCE)               | <input type="checkbox"/>                                                                | <input type="checkbox"/>      | <input type="checkbox"/>          | <input type="checkbox"/>   | <input type="checkbox"/> | <input type="checkbox"/> | <input type="checkbox"/> |

**52. If you selected "other" in the previous question, please specify here below**


---

**53. Is your country collecting ANY OTHER RELEVANT INDICATOR not mentioned above? If yes, could you specify? \***


---



---



---



---



---

**West Nile virus****54. Is West Nile Fever virus a pathogen of relevance for your country? (A relevant pathogen could be an endemic or epidemic pathogen in the country, or an emerging pathogen not yet identified in the country) \****Mark only one oval.*☐ YES☐ NO *Skip to question 59.*☐ Other: 

---

**West Nile virus**

**55. Is your country collecting data on DISEASE FREQUENCY or OCCURRENCE and at which level? \***

*Tick all that apply.*

|                                                                                    | No                       | YES (national aggregated) | YES (regional aggregated) | YES (local or GPS)       | Other                    | I don't know             |
|------------------------------------------------------------------------------------|--------------------------|---------------------------|---------------------------|--------------------------|--------------------------|--------------------------|
| New notified cases / outbreaks (according to National case definition) per year    | <input type="checkbox"/> | <input type="checkbox"/>  | <input type="checkbox"/>  | <input type="checkbox"/> | <input type="checkbox"/> | <input type="checkbox"/> |
| Number confirmed laboratory cases (according to National case definition) per year | <input type="checkbox"/> | <input type="checkbox"/>  | <input type="checkbox"/>  | <input type="checkbox"/> | <input type="checkbox"/> | <input type="checkbox"/> |
| Persons with detected antibodies / tested persons (SERO-PREVALENCE)                | <input type="checkbox"/> | <input type="checkbox"/>  | <input type="checkbox"/>  | <input type="checkbox"/> | <input type="checkbox"/> | <input type="checkbox"/> |

**56. If you selected "other" in the previous question, please specify here below**

---

**57. If yes, where are the collected data stored?**

*Tick all that apply.*

|                                                                                    | Digitalized national database interoperable or integrated with other sectors' databases | Digitalized national database | Non digitalized national database | Local or regional database | Other                    | I don't know             | Non applicable           |
|------------------------------------------------------------------------------------|-----------------------------------------------------------------------------------------|-------------------------------|-----------------------------------|----------------------------|--------------------------|--------------------------|--------------------------|
| New notified cases / outbreaks (according to National case definition) per year    | <input type="checkbox"/>                                                                | <input type="checkbox"/>      | <input type="checkbox"/>          | <input type="checkbox"/>   | <input type="checkbox"/> | <input type="checkbox"/> | <input type="checkbox"/> |
| Number confirmed laboratory cases (according to National case definition) per year | <input type="checkbox"/>                                                                | <input type="checkbox"/>      | <input type="checkbox"/>          | <input type="checkbox"/>   | <input type="checkbox"/> | <input type="checkbox"/> | <input type="checkbox"/> |
| Persons with detected antibodies / tested persons (SERO-PREVALENCE)                | <input type="checkbox"/>                                                                | <input type="checkbox"/>      | <input type="checkbox"/>          | <input type="checkbox"/>   | <input type="checkbox"/> | <input type="checkbox"/> | <input type="checkbox"/> |

**58. If you selected "other" in the previous question, please specify here below**

---

59. Is your country collecting ANY OTHER RELEVANT INDICATOR not mentioned above? If yes, could you specify? \*

---



---



---



---



---

## Zika virus

60. Is Zika virus a pathogen of relevance for your country? (A relevant pathogen could be an endemic or epidemic pathogen in the country, or an emerging pathogen not yet identified in the country) \*

Mark only one oval.

- ☐ YES
- ☐ NO Skip to question 65.
- ☐ Other: \_\_\_\_\_

## Zika virus

61. Is your country collecting data on DISEASE FREQUENCY or OCCURRENCE and at which level? \*

Tick all that apply.

|                                                                                    | No                       | YES (national aggregated) | YES (regional aggregated) | YES (local or GPS)       | Other                    | I don't know             |
|------------------------------------------------------------------------------------|--------------------------|---------------------------|---------------------------|--------------------------|--------------------------|--------------------------|
| New notified cases / outbreaks (according to National case definition) per year    | <input type="checkbox"/> | <input type="checkbox"/>  | <input type="checkbox"/>  | <input type="checkbox"/> | <input type="checkbox"/> | <input type="checkbox"/> |
| Number confirmed laboratory cases (according to National case definition) per year | <input type="checkbox"/> | <input type="checkbox"/>  | <input type="checkbox"/>  | <input type="checkbox"/> | <input type="checkbox"/> | <input type="checkbox"/> |
| Persons with detected antibodies / tested persons (SERO- PREVALENCE)               | <input type="checkbox"/> | <input type="checkbox"/>  | <input type="checkbox"/>  | <input type="checkbox"/> | <input type="checkbox"/> | <input type="checkbox"/> |

62. If you selected "other" in the previous question, please specify here below

---

**63. If yes, where are the collected data stored?***Tick all that apply.*

|                                                                                    | Digitalized national database interoperable or integrated with other sectors' databases | Digitalized national database | Non digitalized national database | Local or regional database | Other                    | I don't know             | Non applicable           |
|------------------------------------------------------------------------------------|-----------------------------------------------------------------------------------------|-------------------------------|-----------------------------------|----------------------------|--------------------------|--------------------------|--------------------------|
| New notified cases / outbreaks (according to National case definition) per year    | <input type="checkbox"/>                                                                | <input type="checkbox"/>      | <input type="checkbox"/>          | <input type="checkbox"/>   | <input type="checkbox"/> | <input type="checkbox"/> | <input type="checkbox"/> |
| Number confirmed laboratory cases (according to National case definition) per year | <input type="checkbox"/>                                                                | <input type="checkbox"/>      | <input type="checkbox"/>          | <input type="checkbox"/>   | <input type="checkbox"/> | <input type="checkbox"/> | <input type="checkbox"/> |
| Persons with detected antibodies / tested persons (SERO- PREVALENCE)               | <input type="checkbox"/>                                                                | <input type="checkbox"/>      | <input type="checkbox"/>          | <input type="checkbox"/>   | <input type="checkbox"/> | <input type="checkbox"/> | <input type="checkbox"/> |

**64. If you selected "other" in the previous question, please specify here below**


---

**65. Is your country collecting ANY OTHER RELEVANT INDICATOR not mentioned above? If yes, could you specify? \***


---



---



---



---



---

**Climate & Environment**

This section is collecting information on indicators regarding Climate & Environment regardless of the pathogens

**Climate & Environment**



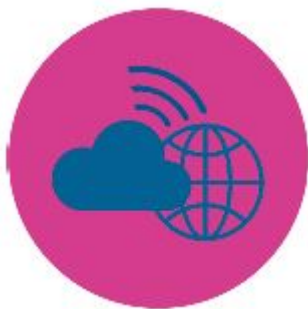

**66. Is your country collecting data on TEMPERATURE and at which level? \***

*Tick all that apply.*

- ☐ NO
- ☐ YES - National aggregated
- ☐ YES - Regional aggregated
- ☐ YES - Local or GPS
- ☐ I don't know
- ☐ Other: \_\_\_\_\_

**67. If yes, which specific data on TEMPERATURE is your country collecting?**

*Tick all that apply.*

- ☐ Maximum temperature
- ☐ Annual average of mean temperature
- ☐ I don't know
- ☐ Other: \_\_\_\_\_

**68. If yes, where are the collected data on TEMPERATURE stored?**

*Tick all that apply.*

- ☐ Digitalized national database interoperable or integrated with other sectors' databases
- ☐ Digitalized national database
- ☐ Non digitalized national database
- ☐ Local or regional database
- ☐ I don't know
- ☐ Other: \_\_\_\_\_

**69. Is your country collecting data on PRECIPITATIONS and at which level? \***

*Tick all that apply.*

- ☐ NO
- ☐ YES - National aggregated
- ☐ YES - Regional aggregated
- ☐ YES - Local or GPS
- ☐ I don't know
- ☐ Other: \_\_\_\_\_

**70. If yes, which specific data on PRECIPITATIONS is your country collecting?***Tick all that apply.*

- ☐ Monthly precipitation
- ☐ Weekly precipitation
- ☐ I don't know
- ☐ Other: \_\_\_\_\_

**71. If yes, where are the collected data on PRECIPITATIONS stored?***Tick all that apply.*

- ☐ Digitalized national database interoperable or integrated with other sectors' databases
- ☐ Digitalized national database
- ☐ Non digitalized national database
- ☐ Local or regional database
- ☐ I don't know
- ☐ Other: \_\_\_\_\_

**72. Where are the METEOROLOGICAL STATIONS of your country? Please specify place and region. If you don't know, please answer "I don't know". \***

---

---

---

---

---

**73. Which variables are routinely recorded in your meteorological stations?***Tick all that apply.*

- ☐ Temperature
- ☐ Precipitations
- ☐ I don't know
- ☐ Other: \_\_\_\_\_

**74. Is your country collecting data on VEGETATION and at which level? \****Tick all that apply.*

- ☐ NO
- ☐ YES - National aggregated
- ☐ YES - Regional aggregated
- ☐ YES - Local or GPS
- ☐ I don't know
- ☐ Other: \_\_\_\_\_

**75. If yes, which specific data on VEGETATION is your country collecting?**

---

**76. If yes, where are the collected data on VEGETATION stored?***Tick all that apply.*

- ☐ Digitalized national database interoperable or integrated with other sectors' databases
- ☐ Digitalized national database
- ☐ Non digitalized national database
- ☐ Local or regional database
- ☐ I don't know
- ☐ Other: \_\_\_\_\_

**77. Is your country collecting data on LAND USE and at which level? \****Tick all that apply.*

- ☐ NO
- ☐ YES - National aggregated
- ☐ YES - Regional aggregated
- ☐ YES - Local or GPS
- ☐ I don't know
- ☐ Other: \_\_\_\_\_

**78. If yes, which specific data on LAND USE is your country collecting?***Tick all that apply.*

- ☐ Forest, mixed vegetation, cropland or urban land uses
- ☐ I don't know
- ☐ Other: \_\_\_\_\_

**79. If yes, where are the collected data on LAND USE stored?***Tick all that apply.*

- ☐ Digitalized national database interoperable or integrated with other sectors' databases
- ☐ Digitalized national database
- ☐ Non digitalized national database
- ☐ Local or regional database
- ☐ I don't know
- ☐ Other: \_\_\_\_\_

**80. Is your country collecting data on LAND COVER and at which level? \****Tick all that apply.*

- ☐ NO
- ☐ YES - National aggregated
- ☐ YES - Regional aggregated
- ☐ YES - Local or GPS
- ☐ I don't know
- ☐ Other: \_\_\_\_\_

**81. If yes, which specific data on LAND COVER is your country collecting?***Tick all that apply.*

- ☐ Artificial, cultivated, herbaceous cover, tree cover, mosaic and water
- ☐ I don't know
- ☐ Other: \_\_\_\_\_

**82. If yes, where are the collected data on LAND COVER stored?***Tick all that apply.*

- ☐ Digitalized national database interoperable or integrated with other sectors' databases
- ☐ Digitalized national database
- ☐ Non digitalized national database
- ☐ Local or regional database
- ☐ I don't know
- ☐ Other: \_\_\_\_\_

**83. Is your country collecting data on SOIL TYPE and at which level? \****Tick all that apply.*

- ☐ NO
- ☐ YES - National aggregated
- ☐ YES - Regional aggregated
- ☐ YES - Local or GPS
- ☐ I don't know
- ☐ Other: \_\_\_\_\_

**84. If yes, which specific data on SOIL TYPE is your country collecting?**

---

**85. If yes, where are the collected data on SOIL TYPE stored?***Tick all that apply.*

- ☐ Digitalized national database interoperable or integrated with other sectors' databases
- ☐ Digitalized national database
- ☐ Non digitalized national database
- ☐ Local or regional database
- ☐ I don't know
- ☐ Other: \_\_\_\_\_

**86. The above mentioned indicators are collected by which INSTITUTION / INSTITUTIONS? If you don't know, please answer "I don't know". \***

---

---

---

---

---

**87. Has your office access to any GLOBAL PUBLIC DATASET related to Climate & Environment? \****Mark only one oval.*

- ☐ Yes
- ☐ No
- ☐ I don't know
- ☐ Other: \_\_\_\_\_

**88. If yes, which one/ones? Are you using it/them for which purpose?**

---

---

---

---

---

**89. Is your country collecting ANY OTHER RELEVANT INDICATOR not mentioned above? If yes, could you specify? \***

---

---

---

---

---

## Conclusions

**90. Please feel free to put any comment, suggestion or remark here below**

---

---

---

---

---

**Thank you very much for your time and consideration!**

**MediLabSecure 2 is a project funded by the EC DEVCO (IFS/2018/402-247)**

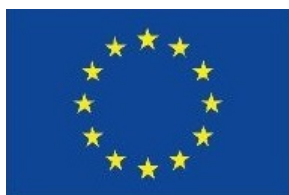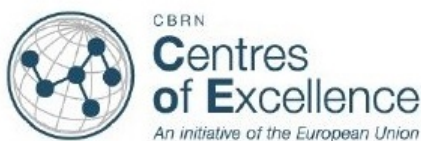

**Please be kindly informed that the information you have provided with this questionnaire will be shared and disseminated only in aggregated form with the information provided by all the other MLS Countries involved in this survey.**

---

☐ Send me a copy of my responses.

---

Powered by

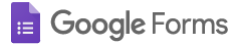

Supplement: s1 [file s1]
