# Supplementary material for: Integrated Early Warning Surveillance: Achilles′ Heel of One Health?
Source: MDPI journal article supplement (doi:10.3390/microorganisms8010084), 2020-01-08
Supplement: s1 [file s1]

# Indicators for Early Warning and Risk Assessment - VECTOR

Contact information

\*Required

## 1. Email address \*

## MediLabSecure (MLS) One Health Project - Surveillance of Arbovirus infections

---

### Purpose of the survey

---

Goal of this survey is to collect information on important indicators for risk assessment and early warning of arboviruses of relevance in the countries of the MLS Network, focusing on IF and HOW such information are collected at country level.

Please, complete each part of the questionnaire in the most accurate way possible.  
For any further clarification, feel free to contact us at [laura.amato@iss.it](mailto:laura.amato@iss.it)

Many thanks in advance for your time and consideration.

The Public Health Work Package of MLS

### Structure of the questionnaire

---

The present questionnaire focuses on 7 relevant pathogens (namely Chikungunya virus, Crimean-Congo Haemorrhagic fever virus, Dengue fever virus, Yellow fever virus, Rift Valley fever virus, West Nile virus, Zika virus).

Each sector involved in the surveillance activities of the above pathogens (vector, human, animal) collects data in accordance with respective surveillance priorities. You are kindly asked to fill in this questionnaire that is specifically related to your field of expertise and sector of activity.

Each section is dedicated to one pathogen. At the beginning of each section, a question asking on the relevance of the pathogen for your country lets you provide information on the pathogen or skip to the next one.

Good luck and thank you for your support!

### Vector

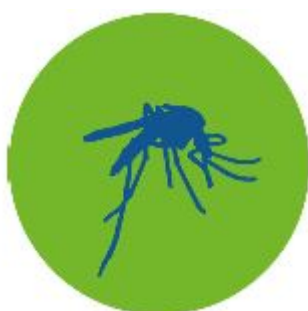

**2. Country \***

---

**3. Family name \***

---

**4. Given name \***

---

**5. Name of your Institution \***

---

**6. Name of your Laboratory \***

---

**7. Of which MediLabSecure networks is your laboratory part of? \****Tick all that apply.*

- ☐ Human Virology
- ☐ Animal Virology
- ☐ Medical Entomology
- ☐ Human Public Health
- ☐ Animal Public Health
- ☐ Other: 

---

**8. Family name, given name and affiliation of other contributors to the compilation of the survey, if any**

---

---

---

---

---

## Chikungunya virus

**9. Is Chikungunya virus a pathogen of relevance for your country? (A relevant pathogen could be an endemic or epidemic pathogen in the country, or an emerging pathogen not yet identified in the country) \****Mark only one oval.*

- ☐ YES
- ☐ NO      *Skip to question 23.*
- ☐ Other: 

---

## Chikungunya virus

**10. Is your country collecting data on VECTOR PRESENCE and at which level? \****Tick all that apply.*

- ☐ NO
- ☐ YES - National aggregated
- ☐ YES - Regional aggregated
- ☐ YES - Local or GPS
- ☐ I don't know
- ☐ Other: \_\_\_\_\_

**11. If yes, where are the collected data on VECTOR PRESENCE stored?***Tick all that apply.*

- ☐ Digitalized national database interoperable or integrated with other sectors' databases
- ☐ Digitalized national database
- ☐ Non digitalized national database
- ☐ Local or regional database
- ☐ I don't know
- ☐ Other: \_\_\_\_\_

**12. Is your country collecting data on VECTOR ABUNDANCE/DENSITY and at which level? \****Tick all that apply.*

- ☐ NO
- ☐ YES - National aggregated
- ☐ YES - Regional aggregated
- ☐ YES - Local or GPS
- ☐ I don't know
- ☐ Other: \_\_\_\_\_

**13. If yes, which specific data on VECTOR ABUNDANCE/DENSITY is your country collecting?***Tick all that apply.*

- ☐ Mosquitoes/ha
- ☐ Mosquitoes/trap
- ☐ Mosquitoes/human
- ☐ Percentage of municipalities with the presence of the vector in a given area
- ☐ I don't know
- ☐ Other: \_\_\_\_\_

**14. If yes, where are the collected data on VECTOR ABUNDANCE/DENSITY stored?***Tick all that apply.*

- ☐ Digitalized national database interoperable or integrated with other sectors' databases
- ☐ Digitalized national database
- ☐ Non digitalized national database
- ☐ Local or regional database
- ☐ I don't know
- ☐ Other: \_\_\_\_\_

**15. Is your country collecting data on VECTOR SEASONALITY and at which level? \****Tick all that apply.*

- ☐ NO
- ☐ YES - National aggregated
- ☐ YES - Regional aggregated
- ☐ YES - Local or GPS
- ☐ I don't know
- ☐ Other: \_\_\_\_\_

**16. If yes, which specific data on VECTOR SEASONALITY is your country collecting?***Tick all that apply.*

- ☐ Weeks of vector activity/year
- ☐ Months of vector activity/year
- ☐ Season of vector activity/year
- ☐ I don't know
- ☐ Other: \_\_\_\_\_

**17. If yes, where are the collected data on VECTOR SEASONALITY stored?***Tick all that apply.*

- ☐ Digitalized national database interoperable or integrated with other sectors' databases
- ☐ Digitalized national database
- ☐ Non digitalized national database
- ☐ Local or regional database
- ☐ I don't know
- ☐ Other: \_\_\_\_\_

**18. Is your country collecting data on VECTOR INFECTION RATE and at which level? \****Tick all that apply.*

- ☐ NO
- ☐ YES - National aggregated
- ☐ YES - Regional aggregated
- ☐ YES - Local or GPS
- ☐ I don't know
- ☐ Other: \_\_\_\_\_

**19. If yes, which specific data on VECTOR INFECTION RATE is your country collecting?***Tick all that apply.*

- ☐ N. positive pools/total tested pools
- ☐ I don't know
- ☐ Other: \_\_\_\_\_

**20. If yes, where are the collected data on VECTOR INFECTION RATE stored?***Tick all that apply.*

- ☐ Digitalized national database interoperable or integrated with other sectors' databases
- ☐ Digitalized national database
- ☐ Non digitalized national database
- ☐ Local or regional database
- ☐ I don't know
- ☐ Other: \_\_\_\_\_

**21. Has your office access to any GLOBAL PUBLIC DATASET related to vectors? \****Mark only one oval.*

- ☐ Yes
- ☐ No
- ☐ I don't know
- ☐ Other: \_\_\_\_\_

**22. If yes, which one/ones? Are you using it/them for which purpose?**

---

---

---

---

---

**23. Is your country collecting ANY OTHER RELEVANT INDICATOR not mentioned above? If yes, could you specify? \***

---

---

---

---

---

**Crimean-Congo Haemorrhagic fever virus**

24. Is Crimean-Congo Haemorrhagic fever virus a pathogen of relevance for your country? (A relevant pathogen could be an endemic or epidemic pathogen in the country, or an emerging pathogen not yet identified in the country) \*

Mark only one oval.

- ☐ YES
- ☐ NO      *Skip to question 38.*
- ☐ Other: \_\_\_\_\_

## Crimean-Congo Haemorrhagic fever virus

25. Is your country collecting data on VECTOR PRESENCE and at which level? \*

Tick all that apply.

- ☐ NO
- ☐ YES - National aggregated
- ☐ YES - Regional aggregated
- ☐ YES - Local or GPS
- ☐ I don't know
- ☐ Other: \_\_\_\_\_

26. If yes, where are the collected data on VECTOR PRESENCE stored?

Tick all that apply.

- ☐ Digitalized national database interoperable or integrated with other sectors' databases
- ☐ Digitalized national database
- ☐ Non digitalized national database
- ☐ Local or regional database
- ☐ I don't know
- ☐ Other: \_\_\_\_\_

27. Is your country collecting data on VECTOR ABUNDANCE/DENSITY and at which level? \*

Tick all that apply.

- ☐ NO
- ☐ YES - National aggregated
- ☐ YES - Regional aggregated
- ☐ YES - Local or GPS
- ☐ I don't know
- ☐ Other: \_\_\_\_\_

**28. If yes, which specific data on VECTOR ABUNDANCE/DENSITY is your country collecting?***Tick all that apply.*

- ☐ Ticks/ha
- ☐ Ticks/trap
- ☐ Ticks/human or ticks/host
- ☐ Percentage of municipalities with the presence of the vector in a given area
- ☐ I don't know
- ☐ Other: \_\_\_\_\_

**29. If yes, where are the collected data on VECTOR ABUNDANCE/DENSITY stored?***Tick all that apply.*

- ☐ Digitalized national database interoperable or integrated with other sectors' databases
- ☐ Digitalized national database
- ☐ Non digitalized national database
- ☐ Local or regional database
- ☐ I don't know
- ☐ Other: \_\_\_\_\_

**30. Is your country collecting data on VECTOR SEASONALITY and at which level? \****Tick all that apply.*

- ☐ NO
- ☐ YES - National aggregated
- ☐ YES - Regional aggregated
- ☐ YES - Local or GPS
- ☐ I don't know
- ☐ Other: \_\_\_\_\_

**31. If yes, which specific data on VECTOR SEASONALITY is your country collecting?***Tick all that apply.*

- ☐ Weeks of vector activity/year
- ☐ Months of vector activity/year
- ☐ Season of vector activity/year
- ☐ I don't know
- ☐ Other: \_\_\_\_\_

**32. If yes, where are the collected data on VECTOR SEASONALITY stored?***Tick all that apply.*

- ☐ Digitalized national database interoperable or integrated with other sectors' databases
- ☐ Digitalized national database
- ☐ Non digitalized national database
- ☐ Local or regional database
- ☐ I don't know
- ☐ Other: \_\_\_\_\_

**33. Is your country collecting data on VECTOR INFECTION RATE and at which level? \****Tick all that apply.*

- ☐ NO
- ☐ YES - National aggregated
- ☐ YES - Regional aggregated
- ☐ YES - Local or GPS
- ☐ I don't know
- ☐ Other: \_\_\_\_\_

**34. If yes, which specific data on VECTOR INFECTION RATE is your country collecting?***Tick all that apply.*

- ☐ N. positive ticks/total tested ticks
- ☐ I don't know
- ☐ Other: \_\_\_\_\_

**35. If yes, where are the collected data on VECTOR INFECTION RATE stored?***Tick all that apply.*

- ☐ Digitalized national database interoperable or integrated with other sectors' databases
- ☐ Digitalized national database
- ☐ Non digitalized national database
- ☐ Local or regional database
- ☐ I don't know
- ☐ Other: \_\_\_\_\_

**36. Has your office access to any GLOBAL PUBLIC DATASET related to vectors? \****Mark only one oval.*

- ☐ Yes
- ☐ No
- ☐ I don't know
- ☐ Other: \_\_\_\_\_

**37. If yes, which one/ones? Are you using it/them for which purpose?**

---

---

---

---

---

38. Is your country collecting ANY OTHER RELEVANT INDICATOR not mentioned above? If yes, could you specify? \*

---

---

---

---

---

## Dengue virus

39. Is Dengue virus a pathogen of relevance for your country? (A relevant pathogen could be an endemic or epidemic pathogen in the country, or an emerging pathogen not yet identified in the country) \*

Mark only one oval.

- ☐ YES
- ☐ NO Skip to question 54.
- ☐ Other: \_\_\_\_\_

## Dengue virus

40. Did you already provided information on this vector, answering to the questions in the Chikungunya Section? \*

Mark only one oval.

- ☐ YES Skip to question 54.
- ☐ NO

## Dengue virus

41. Is your country collecting data on VECTOR PRESENCE and at which level? \*

Tick all that apply.

- ☐ NO
- ☐ YES - National aggregated
- ☐ YES - Regional aggregated
- ☐ YES - Local or GPS
- ☐ I don't know
- ☐ Other: \_\_\_\_\_

42. If yes, where are the collected data on VECTOR PRESENCE stored?

Tick all that apply.

- ☐ Digitalized national database interoperable or integrated with other sectors' databases
- ☐ Digitalized national database
- ☐ Non digitalized national database
- ☐ Local or regional database
- ☐ I don't know
- ☐ Other: \_\_\_\_\_

**43. Is your country collecting data on VECTOR ABUNDANCE/DENSITY and at which level? \****Tick all that apply.*

- ☐ NO
- ☐ YES - National aggregated
- ☐ YES - Regional aggregated
- ☐ YES - Local or GPS
- ☐ I don't know
- ☐ Other: \_\_\_\_\_

**44. If yes, which specific data on VECTOR ABUNDANCE/DENSITY is your country collecting?***Tick all that apply.*

- ☐ Mosquitoes/ha
- ☐ Mosquitoes/trap
- ☐ Mosquitoes/human
- ☐ Percentage of municipalities with the presence of the vector in a given area
- ☐ I don't know
- ☐ Other: \_\_\_\_\_

**45. If yes, where are the collected data on VECTOR ABUNDANCE/DENSITY stored?***Tick all that apply.*

- ☐ Digitalized national database interoperable or integrated with other sectors' databases
- ☐ Digitalized national database
- ☐ Non digitalized national database
- ☐ Local or regional database
- ☐ I don't know
- ☐ Other: \_\_\_\_\_

**46. Is your country collecting data on VECTOR SEASONALITY and at which level? \****Tick all that apply.*

- ☐ NO
- ☐ YES - National aggregated
- ☐ YES - Regional aggregated
- ☐ YES - Local or GPS
- ☐ I don't know
- ☐ Other: \_\_\_\_\_

**47. If yes, which specific data on VECTOR SEASONALITY is your country collecting?***Tick all that apply.*

- ☐ Weeks of vector activity/year
- ☐ Months of vector activity/year
- ☐ Season of vector activity/year
- ☐ I don't know
- ☐ Other: \_\_\_\_\_

**48. If yes, where are the collected data on VECTOR SEASONALITY stored?***Tick all that apply.*

- ☐ Digitalized national database interoperable or integrated with other sectors' databases
- ☐ Digitalized national database
- ☐ Non digitalized national database
- ☐ Local or regional database
- ☐ I don't know
- ☐ Other: \_\_\_\_\_

**49. Is your country collecting data on VECTOR INFECTION RATE and at which level? \****Tick all that apply.*

- ☐ NO
- ☐ YES - National aggregated
- ☐ YES - Regional aggregated
- ☐ YES - Local or GPS
- ☐ I don't know
- ☐ Other: \_\_\_\_\_

**50. If yes, which specific data on VECTOR INFECTION RATE is your country collecting?***Tick all that apply.*

- ☐ N. positive pools/total tested pools
- ☐ I don't know
- ☐ Other: \_\_\_\_\_

**51. If yes, where are the collected data on VECTOR INFECTION RATE stored?***Tick all that apply.*

- ☐ Digitalized national database interoperable or integrated with other sectors' databases
- ☐ Digitalized national database
- ☐ Non digitalized national database
- ☐ Local or regional database
- ☐ I don't know
- ☐ Other: \_\_\_\_\_

**52. Has your office access to any GLOBAL PUBLIC DATASET related to vectors? \****Mark only one oval.*

- ☐ Yes
- ☐ No
- ☐ I don't know
- ☐ Other: \_\_\_\_\_

53. If yes, which one/ones? Are you using it/them for which purpose?

---

---

---

---

---

54. Is your country collecting ANY OTHER RELEVANT INDICATOR not mentioned above? If yes, could you specify? \*

---

---

---

---

---

## Yellow Fever virus

55. Is Yellow Fever virus a pathogen of relevance for your country? (A relevant pathogen could be an endemic or epidemic pathogen in the country, or an emerging pathogen not yet identified in the country) \*

Mark only one oval.

- ☐ YES
- ☐ NO      *Skip to question 70.*
- ☐ Other: \_\_\_\_\_

## Yellow Fever virus

56. Did you already provided information on this vector, answering to the questions in the Chikungunya or Dengue Sections? \*

Mark only one oval.

- ☐ YES      *Skip to question 70.*
- ☐ NO

## Yellow Fever virus

57. Is your country collecting data on VECTOR PRESENCE and at which level? \*

Tick all that apply.

- ☐ NO
- ☐ YES - National aggregated
- ☐ YES - Regional aggregated
- ☐ YES - Local or GPS
- ☐ I don't know
- ☐ Other: \_\_\_\_\_

**58. If yes, where are the collected data on VECTOR PRESENCE stored?***Tick all that apply.*

- ☐ Digitalized national database interoperable or integrated with other sectors' databases
- ☐ Digitalized national database
- ☐ Non digitalized national database
- ☐ Local or regional database
- ☐ I don't know
- ☐ Other: \_\_\_\_\_

**59. Is your country collecting data on VECTOR ABUNDANCE/DENSITY and at which level? \****Tick all that apply.*

- ☐ NO
- ☐ YES - National aggregated
- ☐ YES - Regional aggregated
- ☐ YES - Local or GPS
- ☐ I don't know
- ☐ Other: \_\_\_\_\_

**60. If yes, which specific data on VECTOR ABUNDANCE/DENSITY is your country collecting?***Tick all that apply.*

- ☐ Mosquitoes/ha
- ☐ Mosquitoes/trap
- ☐ Mosquitoes/human
- ☐ Percentage of municipalities with the presence of the vector in a given area
- ☐ I don't know
- ☐ Other: \_\_\_\_\_

**61. If yes, where are the collected data on VECTOR ABUNDANCE/DENSITY stored?***Tick all that apply.*

- ☐ Digitalized national database interoperable or integrated with other sectors' databases
- ☐ Digitalized national database
- ☐ Non digitalized national database
- ☐ Local or regional database
- ☐ I don't know
- ☐ Other: \_\_\_\_\_

**62. Is your country collecting data on VECTOR SEASONALITY and at which level? \****Tick all that apply.*

- ☐ NO
- ☐ YES - National aggregated
- ☐ YES - Regional aggregated
- ☐ YES - Local or GPS
- ☐ I don't know
- ☐ Other: \_\_\_\_\_

**63. If yes, which specific data on VECTOR SEASONALITY is your country collecting?***Tick all that apply.*

- ☐ Weeks of vector activity/year
- ☐ Months of vector activity/year
- ☐ Season of vector activity/year
- ☐ I don't know
- ☐ Other: \_\_\_\_\_

**64. If yes, where are the collected data on VECTOR SEASONALITY stored?***Tick all that apply.*

- ☐ Digitalized national database interoperable or integrated with other sectors' databases
- ☐ Digitalized national database
- ☐ Non digitalized national database
- ☐ Local or regional database
- ☐ I don't know
- ☐ Other: \_\_\_\_\_

**65. Is your country collecting data on VECTOR INFECTION RATE and at which level? \****Tick all that apply.*

- ☐ NO
- ☐ YES - National aggregated
- ☐ YES - Regional aggregated
- ☐ YES - Local or GPS
- ☐ I don't know
- ☐ Other: \_\_\_\_\_

**66. If yes, which specific data on VECTOR INFECTION RATE is your country collecting?***Tick all that apply.*

- ☐ N. positive pools/total tested pools
- ☐ I don't know
- ☐ Other: \_\_\_\_\_

**67. If yes, where are the collected data on VECTOR INFECTION RATE stored?***Tick all that apply.*

- ☐ Digitalized national database interoperable or integrated with other sectors' databases
- ☐ Digitalized national database
- ☐ Non digitalized national database
- ☐ Local or regional database
- ☐ I don't know
- ☐ Other: \_\_\_\_\_

**68. Has your office access to any GLOBAL PUBLIC DATASET related to vectors? \****Mark only one oval.*

- ☐ Yes
- ☐ No
- ☐ I don't know
- ☐ Other: \_\_\_\_\_

**69. If yes, which one/ones? Are you using it/them for which purpose?**

---

---

---

---

---

**70. Is your country collecting ANY OTHER RELEVANT INDICATOR not mentioned above? If yes, could you specify? \***

---

---

---

---

---

## Rift Valley Fever virus

**71. Is Rift Valley Fever virus a pathogen of relevance for your country? (A relevant pathogen could be an endemic or epidemic pathogen in the country, or an emerging pathogen not yet identified in the country) \****Mark only one oval.*

- ☐ YES
- ☐ NO      *Skip to question 85.*
- ☐ Other: \_\_\_\_\_

## Rift Valley Fever virus

**72. Is your country collecting data on VECTOR PRESENCE and at which level? \****Tick all that apply.*

- ☐ NO
- ☐ YES - National aggregated
- ☐ YES - Regional aggregated
- ☐ YES - Local or GPS
- ☐ I don't know
- ☐ Other: \_\_\_\_\_

**73. If yes, where are the collected data on VECTOR PRESENCE stored?***Tick all that apply.*

- ☐ Digitalized national database interoperable or integrated with other sectors' databases
- ☐ Digitalized national database
- ☐ Non digitalized national database
- ☐ Local or regional database
- ☐ I don't know
- ☐ Other: \_\_\_\_\_

**74. Is your country collecting data on VECTOR ABUNDANCE/DENSITY and at which level? \****Tick all that apply.*

- ☐ NO
- ☐ YES - National aggregated
- ☐ YES - Regional aggregated
- ☐ YES - Local or GPS
- ☐ I don't know
- ☐ Other: \_\_\_\_\_

**75. If yes, which specific data on VECTOR ABUNDANCE/DENSITY is your country collecting?***Tick all that apply.*

- ☐ Mosquitoes/ha
- ☐ Mosquitoes/trap
- ☐ Mosquitoes/human
- ☐ Percentage of municipalities with the presence of the vector in a given area
- ☐ I don't know
- ☐ Other: \_\_\_\_\_

**76. If yes, where are the collected data on VECTOR ABUNDANCE/DENSITY stored?***Tick all that apply.*

- ☐ Digitalized national database interoperable or integrated with other sectors' databases
- ☐ Digitalized national database
- ☐ Non digitalized national database
- ☐ Local or regional database
- ☐ I don't know
- ☐ Other: \_\_\_\_\_

**77. Is your country collecting data on VECTOR SEASONALITY and at which level? \****Tick all that apply.*

- ☐ NO
- ☐ YES - National aggregated
- ☐ YES - Regional aggregated
- ☐ YES - Local or GPS
- ☐ I don't know
- ☐ Other: \_\_\_\_\_

**78. If yes, which specific data on VECTOR SEASONALITY is your country collecting?***Tick all that apply.*

- ☐ Weeks of vector activity/year
- ☐ Months of vector activity/year
- ☐ Season of vector activity/year
- ☐ I don't know
- ☐ Other: \_\_\_\_\_

**79. If yes, where are the collected data on VECTOR SEASONALITY stored?***Tick all that apply.*

- ☐ Digitalized national database interoperable or integrated with other sectors' databases
- ☐ Digitalized national database
- ☐ Non digitalized national database
- ☐ Local or regional database
- ☐ I don't know
- ☐ Other: \_\_\_\_\_

**80. Is your country collecting data on VECTOR INFECTION RATE and at which level? \****Tick all that apply.*

- ☐ NO
- ☐ YES - National aggregated
- ☐ YES - Regional aggregated
- ☐ YES - Local or GPS
- ☐ I don't know
- ☐ Other: \_\_\_\_\_

81. If yes, which specific data on VECTOR INFECTION RATE is your country collecting?

*Tick all that apply.*

- ☐ N. positive pools/total tested pools
- ☐ I don't know
- ☐ Other: \_\_\_\_\_

82. If yes, where are the collected data on VECTOR INFECTION RATE stored?

*Tick all that apply.*

- ☐ Digitalized national database interoperable or integrated with other sectors' databases
- ☐ Digitalized national database
- ☐ Non digitalized national database
- ☐ Local or regional database
- ☐ I don't know
- ☐ Other: \_\_\_\_\_

83. Has your office access to any GLOBAL PUBLIC DATASET related to vectors? \*

*Mark only one oval.*

- ☐ Yes
- ☐ No
- ☐ I don't know
- ☐ Other: \_\_\_\_\_

84. If yes, which one/ones? Are you using it/them for which purpose?

---

---

---

---

---

85. Is your country collecting ANY OTHER RELEVANT INDICATOR not mentioned above? If yes, could you specify? \*

---

---

---

---

---

## West Nile virus

86. **Is West Nile Fever virus a pathogen of relevance for your country? (A relevant pathogen could be an endemic or epidemic pathogen in the country, or an emerging pathogen not yet identified in the country) \***

*Mark only one oval.*

- ☐ YES
- ☐ NO      *Skip to question 100.*
- ☐ Other: \_\_\_\_\_

## West Nile virus

87. **Is your country collecting data on VECTOR PRESENCE and at which level? \***

*Tick all that apply.*

- ☐ NO
- ☐ YES - National aggregated
- ☐ YES - Regional aggregated
- ☐ YES - Local or GPS
- ☐ I don't know
- ☐ Other: \_\_\_\_\_

88. **If yes, where are the collected data on VECTOR PRESENCE stored?**

*Tick all that apply.*

- ☐ Digitalized national database interoperable or integrated with other sectors' databases
- ☐ Digitalized national database
- ☐ Non digitalized national database
- ☐ Local or regional database
- ☐ I don't know
- ☐ Other: \_\_\_\_\_

89. **Is your country collecting data on VECTOR ABUNDANCE/DENSITY and at which level? \***

*Tick all that apply.*

- ☐ NO
- ☐ YES - National aggregated
- ☐ YES - Regional aggregated
- ☐ YES - Local or GPS
- ☐ I don't know
- ☐ Other: \_\_\_\_\_

**90. If yes, which specific data on VECTOR ABUNDANCE/DENSITY is your country collecting?***Tick all that apply.*

- ☐ Mosquitoes/ha
- ☐ Mosquitoes/trap
- ☐ Mosquitoes/human
- ☐ Percentage of municipalities with the presence of the vector in a given area
- ☐ I don't know
- ☐ Other: \_\_\_\_\_

**91. If yes, where are the collected data on VECTOR ABUNDANCE/DENSITY stored?***Tick all that apply.*

- ☐ Digitalized national database interoperable or integrated with other sectors' databases
- ☐ Digitalized national database
- ☐ Non digitalized national database
- ☐ Local or regional database
- ☐ I don't know
- ☐ Other: \_\_\_\_\_

**92. Is your country collecting data on VECTOR SEASONALITY and at which level? \****Tick all that apply.*

- ☐ NO
- ☐ YES - National aggregated
- ☐ YES - Regional aggregated
- ☐ YES - Local or GPS
- ☐ I don't know
- ☐ Other: \_\_\_\_\_

**93. If yes, which specific data on VECTOR SEASONALITY is your country collecting?***Tick all that apply.*

- ☐ Weeks of vector activity/year
- ☐ Months of vector activity/year
- ☐ Season of vector activity/year
- ☐ I don't know
- ☐ Other: \_\_\_\_\_

**94. If yes, where are the collected data on VECTOR SEASONALITY stored?***Tick all that apply.*

- ☐ Digitalized national database interoperable or integrated with other sectors' databases
- ☐ Digitalized national database
- ☐ Non digitalized national database
- ☐ Local or regional database
- ☐ I don't know
- ☐ Other: \_\_\_\_\_

**95. Is your country collecting data on VECTOR INFECTION RATE and at which level? \****Tick all that apply.*

- ☐ NO
- ☐ YES - National aggregated
- ☐ YES - Regional aggregated
- ☐ YES - Local or GPS
- ☐ I don't know
- ☐ Other: \_\_\_\_\_

**96. If yes, which specific data on VECTOR INFECTION RATE is your country collecting?***Tick all that apply.*

- ☐ N. positive pools/total tested pools
- ☐ I don't know
- ☐ Other: \_\_\_\_\_

**97. If yes, where are the collected data on VECTOR INFECTION RATE stored?***Tick all that apply.*

- ☐ Digitalized national database interoperable or integrated with other sectors' databases
- ☐ Digitalized national database
- ☐ Non digitalized national database
- ☐ Local or regional database
- ☐ I don't know
- ☐ Other: \_\_\_\_\_

**98. Has your office access to any GLOBAL PUBLIC DATASET related to vectors? \****Mark only one oval.*

- ☐ Yes
- ☐ No
- ☐ I don't know
- ☐ Other: \_\_\_\_\_

**99. If yes, which one/ones? Are you using it/them for which purpose?**

---

---

---

---

---

100. Is your country collecting ANY OTHER RELEVANT INDICATOR not mentioned above? If yes, could you specify? \*

---

---

---

---

---

## Zika virus

101. Is Zika virus a pathogen of relevance for your country? (A relevant pathogen could be an endemic or epidemic pathogen in the country, or an emerging pathogen not yet identified in the country) \*

Mark only one oval.

- ☐ YES
- ☐ NO Skip to question 116.
- ☐ Other: \_\_\_\_\_

## Zika virus

102. Did you already provided information on this vector, answering to the questions in the Chikungunya or Dengue or Yellow Fever Sections? \*

Mark only one oval.

- ☐ YES Skip to question 116.
- ☐ NO

## Zika virus

103. Is your country collecting data on VECTOR PRESENCE and at which level? \*

Tick all that apply.

- ☐ NO
- ☐ YES - National aggregated
- ☐ YES - Regional aggregated
- ☐ YES - Local or GPS
- ☐ I don't know
- ☐ Other: \_\_\_\_\_

104. If yes, where are the collected data on VECTOR PRESENCE stored?

Tick all that apply.

- ☐ Digitalized national database interoperable or integrated with other sectors' databases
- ☐ Digitalized national database
- ☐ Non digitalized national database
- ☐ Local or regional database
- ☐ I don't know
- ☐ Other: \_\_\_\_\_

**105. Is your country collecting data on VECTOR ABUNDANCE/DENSITY and at which level? \****Tick all that apply.*

- ☐ NO
- ☐ YES - National aggregated
- ☐ YES - Regional aggregated
- ☐ YES - Local or GPS
- ☐ I don't know
- ☐ Other: \_\_\_\_\_

**106. If yes, which specific data on VECTOR ABUNDANCE/DENSITY is your country collecting?***Tick all that apply.*

- ☐ Mosquitoes/ha
- ☐ Mosquitoes/trap
- ☐ Mosquitoes/human
- ☐ Percentage of municipalities with the presence of the vector in a given area
- ☐ I don't know
- ☐ Other: \_\_\_\_\_

**107. If yes, where are the collected data on VECTOR ABUNDANCE/DENSITY stored?***Tick all that apply.*

- ☐ Digitalized national database interoperable or integrated with other sectors' databases
- ☐ Digitalized national database
- ☐ Non digitalized national database
- ☐ Local or regional database
- ☐ I don't know
- ☐ Other: \_\_\_\_\_

**108. Is your country collecting data on VECTOR SEASONALITY and at which level? \****Tick all that apply.*

- ☐ NO
- ☐ YES - National aggregated
- ☐ YES - Regional aggregated
- ☐ YES - Local or GPS
- ☐ I don't know
- ☐ Other: \_\_\_\_\_

**109. If yes, which specific data on VECTOR SEASONALITY is your country collecting?***Tick all that apply.*

- ☐ Months of vector activity/year
- ☐ Weeks of vector activity/year
- ☐ Season of vector activity/year
- ☐ I don't know
- ☐ Other: \_\_\_\_\_

**110. If yes, where are the collected data on VECTOR SEASONALITY stored?***Tick all that apply.*

- ☐ Digitalized national database interoperable or integrated with other sectors' databases
- ☐ Digitalized national database
- ☐ Non digitalized national database
- ☐ Local or regional database
- ☐ I don't know
- ☐ Other: \_\_\_\_\_

**111. Is your country collecting data on VECTOR INFECTION RATE and at which level? \****Tick all that apply.*

- ☐ NO
- ☐ YES - National aggregated
- ☐ YES - Regional aggregated
- ☐ YES - Local or GPS
- ☐ I don't know
- ☐ Other: \_\_\_\_\_

**112. If yes, which specific data on VECTOR INFECTION RATE is your country collecting?***Tick all that apply.*

- ☐ N. positive pools/total tested pools
- ☐ I don't know
- ☐ Other: \_\_\_\_\_

**113. If yes, where are the collected data on VECTOR INFECTION RATE stored?***Tick all that apply.*

- ☐ Digitalized national database interoperable or integrated with other sectors' databases
- ☐ Digitalized national database
- ☐ Non digitalized national database
- ☐ Local or regional database
- ☐ I don't know
- ☐ Other: \_\_\_\_\_

**114. Has your office access to any GLOBAL PUBLIC DATASET related to vectors? \****Mark only one oval.*

- ☐ Yes
- ☐ No
- ☐ I don't know
- ☐ Other: \_\_\_\_\_

115. If yes, which one/ones? Are you using it/them for which purpose?

---



---



---



---



---

116. Is your country collecting ANY OTHER RELEVANT INDICATOR not mentioned above? If yes, could you specify? \*

---



---



---



---



---

## Climate & Environment

This section is collecting information on indicators regarding Climate & Environment regardless of the pathogens

## Climate & Environment

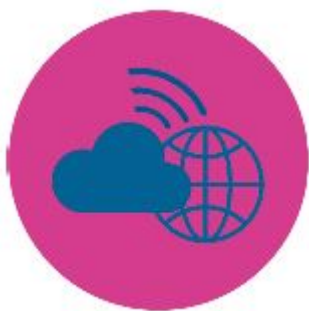

117. Is your country collecting data on TEMPERATURE and at which level? \*

*Tick all that apply.*

- ☐ NO
- ☐ YES - National aggregated
- ☐ YES - Regional aggregated
- ☐ YES - Local or GPS
- ☐ I don't know
- ☐ Other: \_\_\_\_\_

118. If yes, which specific data on TEMPERATURE is your country collecting?

*Tick all that apply.*

- ☐ Maximum temperature
- ☐ Annual average of mean temperature
- ☐ I don't know
- ☐ Other: \_\_\_\_\_

**119. If yes, where are the collected data on TEMPERATURE stored?***Tick all that apply.*

- ☐ Digitalized national database interoperable or integrated with other sectors' databases
- ☐ Digitalized national database
- ☐ Non digitalized national database
- ☐ Local or regional database
- ☐ I don't know
- ☐ Other: \_\_\_\_\_

**120. Is your country collecting data on PRECIPITATIONS and at which level? \****Tick all that apply.*

- ☐ NO
- ☐ YES - National aggregated
- ☐ YES - Regional aggregated
- ☐ YES - Local or GPS
- ☐ I don't know
- ☐ Other: \_\_\_\_\_

**121. If yes, which specific data on PRECIPITATIONS is your country collecting?***Tick all that apply.*

- ☐ Monthly precipitation
- ☐ Weekly precipitation
- ☐ I don't know
- ☐ Other: \_\_\_\_\_

**122. If yes, where are the collected data on PRECIPITATIONS stored?***Tick all that apply.*

- ☐ Digitalized national database interoperable or integrated with other sectors' databases
- ☐ Digitalized national database
- ☐ Non digitalized national database
- ☐ Local or regional database
- ☐ I don't know
- ☐ Other: \_\_\_\_\_

**123. Where are the METEOROLOGICAL STATIONS of your country? Please specify place and region. If you don't know, please answer "I don't know". \***

---

---

---

---

---

**124. Which variables are routinely recorded in your meteorological stations?***Tick all that apply.*

- ☐ Temperature
- ☐ Precipitations
- ☐ I don't know
- ☐ Other: \_\_\_\_\_

**125. Is your country collecting data on VEGETATION and at which level? \****Tick all that apply.*

- ☐ NO
- ☐ YES - National aggregated
- ☐ YES - Regional aggregated
- ☐ YES - Local or GPS
- ☐ I don't know
- ☐ Other: \_\_\_\_\_

**126. If yes, which specific data on VEGETATION is your country collecting?**

---

**127. If yes, where are the collected data on VEGETATION stored?***Tick all that apply.*

- ☐ Digitalized national database interoperable or integrated with other sectors' databases
- ☐ Digitalized national database
- ☐ Non digitalized national database
- ☐ Local or regional database
- ☐ I don't know
- ☐ Other: \_\_\_\_\_

**128. Is your country collecting data on LAND USE and at which level? \****Tick all that apply.*

- ☐ NO
- ☐ YES - National aggregated
- ☐ YES - Regional aggregated
- ☐ YES - Local or GPS
- ☐ I don't know
- ☐ Other: \_\_\_\_\_

**129. If yes, which specific data on LAND USE is your country collecting?***Tick all that apply.*

- ☐ Forest, mixed vegetation, cropland or urban land uses
- ☐ I don't know
- ☐ Other: \_\_\_\_\_

**130. If yes, where are the collected data on LAND USE stored?***Tick all that apply.*

- ☐ Digitalized national database interoperable or integrated with other sectors' databases
- ☐ Digitalized national database
- ☐ Non digitalized national database
- ☐ Local or regional database
- ☐ I don't know
- ☐ Other: \_\_\_\_\_

**131. Is your country collecting data on LAND COVER and at which level? \****Tick all that apply.*

- ☐ NO
- ☐ YES - National aggregated
- ☐ YES - Regional aggregated
- ☐ YES - Local or GPS
- ☐ I don't know
- ☐ Other: \_\_\_\_\_

**132. If yes, which specific data on LAND COVER is your country collecting?***Tick all that apply.*

- ☐ Artificial, cultivated, herbaceous cover, tree cover, mosaic and water
- ☐ I don't know
- ☐ Other: \_\_\_\_\_

**133. If yes, where are the collected data on LAND COVER stored?***Tick all that apply.*

- ☐ Digitalized national database interoperable or integrated with other sectors' databases
- ☐ Digitalized national database
- ☐ Non digitalized national database
- ☐ Local or regional database
- ☐ I don't know
- ☐ Other: \_\_\_\_\_

**134. Is your country collecting data on SOIL TYPE and at which level? \****Tick all that apply.*

- ☐ NO
- ☐ YES - National aggregated
- ☐ YES - Regional aggregated
- ☐ YES - Local or GPS
- ☐ I don't know
- ☐ Other: \_\_\_\_\_

135. If yes, which specific data on SOIL TYPE is your country collecting?

---

136. If yes, where are the collected data on SOIL TYPE stored?

*Tick all that apply.*

- ☐ Digitalized national database interoperable or integrated with other sectors' databases
- ☐ Digitalized national database
- ☐ Non digitalized national database
- ☐ Local or regional database
- ☐ I don't know
- ☐ Other: \_\_\_\_\_

137. The above mentioned indicators are collected by which INSTITUTION / INSTITUTIONS? If you don't know, please answer "I don't know". \*

---

---

---

---

---

138. Has your office access to any GLOBAL PUBLIC DATASET related to Climate & Environment? \*

*Mark only one oval.*

- ☐ Yes
- ☐ No
- ☐ I don't know
- ☐ Other: \_\_\_\_\_

139. If yes, which one/ones? Are you using it/them for which purpose?

---

---

---

---

---

140. Is your country collecting ANY OTHER RELEVANT INDICATOR not mentioned above? If yes, could you specify? \*

---

---

---

---

---

## Conclusions

141. Please feel free to put any comment, suggestion or remark here below

---

---

---

---

---

**Thank you very much for your time and consideration!**

---

**MediLabSecure 2 is a project funded by the EC DEVCO  
(IFS/2018/402-247)**

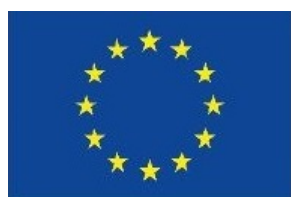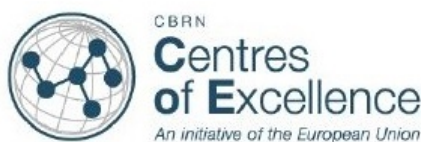

**Please be kindly informed that the information you have provided with this questionnaire will be shared and disseminated only in aggregated form with the information provided by all the other MLS Countries involved in this survey.**

---

☐ Send me a copy of my responses.

---

Powered by  
 Google Forms
