# Supplementary material for: Integrated Early Warning Surveillance: Achilles′ Heel of One Health?
Source: MDPI journal article supplement (doi:10.3390/microorganisms8010084), 2020-01-08
Supplement: s1 [file s1]

# Indicators for Early Warning and Risk Assessment - ANIMAL

Contact information

\*Required

1. Email address \*

---

## MediLabSecure (MLS) One Health Project - Surveillance of Arbovirus infections

---

### Purpose of the survey

---

Goal of this survey is to collect information on important indicators for risk assessment and early warning of arboviruses of relevance in the countries of the MLS Network, focusing on IF and HOW such information are collected at country level.

Please, complete each part of the questionnaire in the most accurate way possible.  
For any further clarification, feel free to contact us at [laura.amato@iss.it](mailto:laura.amato@iss.it)

Many thanks in advance for your time and consideration.

The Public Health Work Package of MLS

### Structure of the questionnaire

---

The present questionnaire focuses on 7 relevant pathogens (namely Chikungunya virus, Crimean-Congo Haemorrhagic fever virus, Dengue fever virus, Yellow fever virus, Rift Valley fever virus, West Nile virus, Zika virus).

Each sector involved in the surveillance activities of the above pathogens (vector, human, animal) collects data in accordance with respective surveillance priorities. You are kindly asked to fill in this questionnaire that is specifically related to your field of expertise and sector of activity.

Each section is dedicated to one pathogen. At the beginning of each section, a question asking on the relevance of the pathogen for your country lets you provide information on the pathogen or skip to the next one.

Good luck and thank you for your support!

## Animal

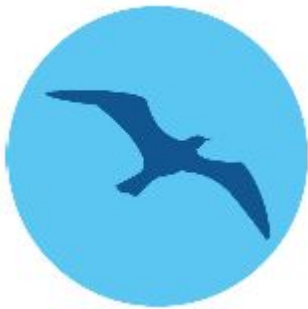

2. Country \*

---

3. Family name \*

---

4. Given name \*

---

5. Name of your Institution \*

---

6. Name of your Laboratory \*

---

7. Of which MediLabSecure networks is your laboratory part of? \*

*Tick all that apply.*

- ☐ Human Virology
- ☐ Animal Virology
- ☐ Medical Entomology
- ☐ Human Public Health
- ☐ Animal Public Health
- ☐ Other: \_\_\_\_\_

8. Family name, given name and affiliation of other contributors to the compilation of the survey, if any

---

---

---

---

---

## Animal Health - General Section

**9. Is your country collecting data on ANIMAL POPULATION DENSITY and at which level? \****Tick all that apply.*

|                                     | No                       | YES (national aggregated) | YES (regional aggregated) | YES (local or municipal) | Other                    | I don't know             |
|-------------------------------------|--------------------------|---------------------------|---------------------------|--------------------------|--------------------------|--------------------------|
| Cattle                              | <input type="checkbox"/> | <input type="checkbox"/>  | <input type="checkbox"/>  | <input type="checkbox"/> | <input type="checkbox"/> | <input type="checkbox"/> |
| Goats                               | <input type="checkbox"/> | <input type="checkbox"/>  | <input type="checkbox"/>  | <input type="checkbox"/> | <input type="checkbox"/> | <input type="checkbox"/> |
| Sheep                               | <input type="checkbox"/> | <input type="checkbox"/>  | <input type="checkbox"/>  | <input type="checkbox"/> | <input type="checkbox"/> | <input type="checkbox"/> |
| Equids                              | <input type="checkbox"/> | <input type="checkbox"/>  | <input type="checkbox"/>  | <input type="checkbox"/> | <input type="checkbox"/> | <input type="checkbox"/> |
| Camels                              | <input type="checkbox"/> | <input type="checkbox"/>  | <input type="checkbox"/>  | <input type="checkbox"/> | <input type="checkbox"/> | <input type="checkbox"/> |
| Wild ruminants                      | <input type="checkbox"/> | <input type="checkbox"/>  | <input type="checkbox"/>  | <input type="checkbox"/> | <input type="checkbox"/> | <input type="checkbox"/> |
| Wild ungulates other than ruminants | <input type="checkbox"/> | <input type="checkbox"/>  | <input type="checkbox"/>  | <input type="checkbox"/> | <input type="checkbox"/> | <input type="checkbox"/> |
| Wild birds                          | <input type="checkbox"/> | <input type="checkbox"/>  | <input type="checkbox"/>  | <input type="checkbox"/> | <input type="checkbox"/> | <input type="checkbox"/> |

**10. If you selected "other" in the previous question, please specify here below**


---

**11. If yes, where are the collected data on ANIMAL POPULATION DENSITY stored?***Tick all that apply.*

|                                     | Digitalized national database interoperable or integrated with other sectors' databases | Digitalized national database | Non digitalized national database | Local or regional database | Other                    | I don't know             |
|-------------------------------------|-----------------------------------------------------------------------------------------|-------------------------------|-----------------------------------|----------------------------|--------------------------|--------------------------|
| Cattle                              | <input type="checkbox"/>                                                                | <input type="checkbox"/>      | <input type="checkbox"/>          | <input type="checkbox"/>   | <input type="checkbox"/> | <input type="checkbox"/> |
| Goats                               | <input type="checkbox"/>                                                                | <input type="checkbox"/>      | <input type="checkbox"/>          | <input type="checkbox"/>   | <input type="checkbox"/> | <input type="checkbox"/> |
| Sheep                               | <input type="checkbox"/>                                                                | <input type="checkbox"/>      | <input type="checkbox"/>          | <input type="checkbox"/>   | <input type="checkbox"/> | <input type="checkbox"/> |
| Equids                              | <input type="checkbox"/>                                                                | <input type="checkbox"/>      | <input type="checkbox"/>          | <input type="checkbox"/>   | <input type="checkbox"/> | <input type="checkbox"/> |
| Camels                              | <input type="checkbox"/>                                                                | <input type="checkbox"/>      | <input type="checkbox"/>          | <input type="checkbox"/>   | <input type="checkbox"/> | <input type="checkbox"/> |
| Wild ruminants                      | <input type="checkbox"/>                                                                | <input type="checkbox"/>      | <input type="checkbox"/>          | <input type="checkbox"/>   | <input type="checkbox"/> | <input type="checkbox"/> |
| Wild ungulates other than ruminants | <input type="checkbox"/>                                                                | <input type="checkbox"/>      | <input type="checkbox"/>          | <input type="checkbox"/>   | <input type="checkbox"/> | <input type="checkbox"/> |
| Wild birds                          | <input type="checkbox"/>                                                                | <input type="checkbox"/>      | <input type="checkbox"/>          | <input type="checkbox"/>   | <input type="checkbox"/> | <input type="checkbox"/> |

**12. If you selected "other" in the previous question, please specify here below**


---

**13. Is your country collecting data on ANIMAL MOVEMENTS AND TRADE and at which level? \****Tick all that apply.*

|                              | No                       | YES (national aggregated) | YES (regional aggregated) | YES (local or GPS)       | Other                    | I don't know             |
|------------------------------|--------------------------|---------------------------|---------------------------|--------------------------|--------------------------|--------------------------|
| Pastoralism and transhumance | <input type="checkbox"/> | <input type="checkbox"/>  | <input type="checkbox"/>  | <input type="checkbox"/> | <input type="checkbox"/> | <input type="checkbox"/> |
| Import and export            | <input type="checkbox"/> | <input type="checkbox"/>  | <input type="checkbox"/>  | <input type="checkbox"/> | <input type="checkbox"/> | <input type="checkbox"/> |
| Wildlife migrations          | <input type="checkbox"/> | <input type="checkbox"/>  | <input type="checkbox"/>  | <input type="checkbox"/> | <input type="checkbox"/> | <input type="checkbox"/> |

14. If you selected "other" in the previous question, please specify here below

---

15. If yes, where are the collected data on ANIMAL MOVEMENTS AND TRADE stored?

*Tick all that apply.*

|                              | Digitalized national database interoperable or integrated with other sectors' databases | Digitalized national database | Non digitalized national database | Local or regional database | Other                    | I don't know             |
|------------------------------|-----------------------------------------------------------------------------------------|-------------------------------|-----------------------------------|----------------------------|--------------------------|--------------------------|
| Pastoralism and transhumance | <input type="checkbox"/>                                                                | <input type="checkbox"/>      | <input type="checkbox"/>          | <input type="checkbox"/>   | <input type="checkbox"/> | <input type="checkbox"/> |
| Import and export            | <input type="checkbox"/>                                                                | <input type="checkbox"/>      | <input type="checkbox"/>          | <input type="checkbox"/>   | <input type="checkbox"/> | <input type="checkbox"/> |
| Wildlife migrations          | <input type="checkbox"/>                                                                | <input type="checkbox"/>      | <input type="checkbox"/>          | <input type="checkbox"/>   | <input type="checkbox"/> | <input type="checkbox"/> |

16. If you selected "other" in the previous question, please specify here below

---

17. Has your office access to any GLOBAL PUBLIC DATASET related to animals? \*

*Mark only one oval.*

- ☐ Yes
- ☐ No
- ☐ I don't know
- ☐ Other: \_\_\_\_\_

18. If yes, which one/ones? Are you using it/them for which purpose?

---



---



---



---



---

## Crimean-Congo Haemorrhagic fever virus

19. Is Crimean-Congo Haemorrhagic fever virus a pathogen of relevance for your country? (A relevant pathogen could be an endemic or epidemic pathogen in the country, or an emerging pathogen not yet identified in the country) \*

*Mark only one oval.*

- ☐ YES
- ☐ NO      *Skip to question 28.*
- ☐ Other: \_\_\_\_\_

## Crimean-Congo Haemorrhagic fever virus

**20. Is your country collecting data on ANIMAL DISEASE OCCURRENCE and at which level? (DISEASE OCCURRENCE: Notified cases / outbreaks (according to National case definition) per year) \***

*Tick all that apply.*

|                                     | No                       | YES (national aggregated) | YES (regional aggregated) | YES (local or GPS)       | Other                    | I don't know             |
|-------------------------------------|--------------------------|---------------------------|---------------------------|--------------------------|--------------------------|--------------------------|
| Cattle                              | <input type="checkbox"/> | <input type="checkbox"/>  | <input type="checkbox"/>  | <input type="checkbox"/> | <input type="checkbox"/> | <input type="checkbox"/> |
| Goats                               | <input type="checkbox"/> | <input type="checkbox"/>  | <input type="checkbox"/>  | <input type="checkbox"/> | <input type="checkbox"/> | <input type="checkbox"/> |
| Sheep                               | <input type="checkbox"/> | <input type="checkbox"/>  | <input type="checkbox"/>  | <input type="checkbox"/> | <input type="checkbox"/> | <input type="checkbox"/> |
| Camels                              | <input type="checkbox"/> | <input type="checkbox"/>  | <input type="checkbox"/>  | <input type="checkbox"/> | <input type="checkbox"/> | <input type="checkbox"/> |
| Wild ruminants                      | <input type="checkbox"/> | <input type="checkbox"/>  | <input type="checkbox"/>  | <input type="checkbox"/> | <input type="checkbox"/> | <input type="checkbox"/> |
| Wild ungulates other than ruminants | <input type="checkbox"/> | <input type="checkbox"/>  | <input type="checkbox"/>  | <input type="checkbox"/> | <input type="checkbox"/> | <input type="checkbox"/> |
| Wild birds                          | <input type="checkbox"/> | <input type="checkbox"/>  | <input type="checkbox"/>  | <input type="checkbox"/> | <input type="checkbox"/> | <input type="checkbox"/> |

**21. If you selected "other" in the previous question, please specify here below**

---

**22. If yes, where are the collected data on ANIMAL DISEASE OCCURRENCE stored?**

*Tick all that apply.*

|                                     | Digitalized national database interoperable or integrated with other sectors' databases | Digitalized national database | Non digitalized national database | Local or regional database | Other                    | I don't know             |
|-------------------------------------|-----------------------------------------------------------------------------------------|-------------------------------|-----------------------------------|----------------------------|--------------------------|--------------------------|
| Cattle                              | <input type="checkbox"/>                                                                | <input type="checkbox"/>      | <input type="checkbox"/>          | <input type="checkbox"/>   | <input type="checkbox"/> | <input type="checkbox"/> |
| Goats                               | <input type="checkbox"/>                                                                | <input type="checkbox"/>      | <input type="checkbox"/>          | <input type="checkbox"/>   | <input type="checkbox"/> | <input type="checkbox"/> |
| Sheep                               | <input type="checkbox"/>                                                                | <input type="checkbox"/>      | <input type="checkbox"/>          | <input type="checkbox"/>   | <input type="checkbox"/> | <input type="checkbox"/> |
| Camels                              | <input type="checkbox"/>                                                                | <input type="checkbox"/>      | <input type="checkbox"/>          | <input type="checkbox"/>   | <input type="checkbox"/> | <input type="checkbox"/> |
| Wild ruminants                      | <input type="checkbox"/>                                                                | <input type="checkbox"/>      | <input type="checkbox"/>          | <input type="checkbox"/>   | <input type="checkbox"/> | <input type="checkbox"/> |
| Wild ungulates other than ruminants | <input type="checkbox"/>                                                                | <input type="checkbox"/>      | <input type="checkbox"/>          | <input type="checkbox"/>   | <input type="checkbox"/> | <input type="checkbox"/> |
| Wild birds                          | <input type="checkbox"/>                                                                | <input type="checkbox"/>      | <input type="checkbox"/>          | <input type="checkbox"/>   | <input type="checkbox"/> | <input type="checkbox"/> |

**23. If you selected "other" in the previous question, please specify here below**

---

**24. Is your country collecting data on ANIMAL DISEASE SERO-PREVALENCE and at which level? (DISEASE SERO-PREVALENCE: Animals with detected antibodies / tested animals)**

\*

*Tick all that apply.*

|                                     | No                       | YES (national aggregated) | YES (regional aggregated) | YES (local or GPS)       | Other                    | I don't know             |
|-------------------------------------|--------------------------|---------------------------|---------------------------|--------------------------|--------------------------|--------------------------|
| Cattle                              | <input type="checkbox"/> | <input type="checkbox"/>  | <input type="checkbox"/>  | <input type="checkbox"/> | <input type="checkbox"/> | <input type="checkbox"/> |
| Goats                               | <input type="checkbox"/> | <input type="checkbox"/>  | <input type="checkbox"/>  | <input type="checkbox"/> | <input type="checkbox"/> | <input type="checkbox"/> |
| Sheep                               | <input type="checkbox"/> | <input type="checkbox"/>  | <input type="checkbox"/>  | <input type="checkbox"/> | <input type="checkbox"/> | <input type="checkbox"/> |
| Camels                              | <input type="checkbox"/> | <input type="checkbox"/>  | <input type="checkbox"/>  | <input type="checkbox"/> | <input type="checkbox"/> | <input type="checkbox"/> |
| Wild ruminants                      | <input type="checkbox"/> | <input type="checkbox"/>  | <input type="checkbox"/>  | <input type="checkbox"/> | <input type="checkbox"/> | <input type="checkbox"/> |
| Wild ungulates other than ruminants | <input type="checkbox"/> | <input type="checkbox"/>  | <input type="checkbox"/>  | <input type="checkbox"/> | <input type="checkbox"/> | <input type="checkbox"/> |
| Wild birds                          | <input type="checkbox"/> | <input type="checkbox"/>  | <input type="checkbox"/>  | <input type="checkbox"/> | <input type="checkbox"/> | <input type="checkbox"/> |

**25. If you selected "other" in the previous question, please specify here below**

---

**26. If yes, where are the collected data on ANIMAL DISEASE SERO-PREVALENCE stored?**

*Tick all that apply.*

|                                     | Digitalized national database interoperable or integrated with other sectors' databases | Digitalized national database | Non digitalized national database | Local or regional database | Other                    | I don't know             |
|-------------------------------------|-----------------------------------------------------------------------------------------|-------------------------------|-----------------------------------|----------------------------|--------------------------|--------------------------|
| Cattle                              | <input type="checkbox"/>                                                                | <input type="checkbox"/>      | <input type="checkbox"/>          | <input type="checkbox"/>   | <input type="checkbox"/> | <input type="checkbox"/> |
| Goats                               | <input type="checkbox"/>                                                                | <input type="checkbox"/>      | <input type="checkbox"/>          | <input type="checkbox"/>   | <input type="checkbox"/> | <input type="checkbox"/> |
| Sheep                               | <input type="checkbox"/>                                                                | <input type="checkbox"/>      | <input type="checkbox"/>          | <input type="checkbox"/>   | <input type="checkbox"/> | <input type="checkbox"/> |
| Camels                              | <input type="checkbox"/>                                                                | <input type="checkbox"/>      | <input type="checkbox"/>          | <input type="checkbox"/>   | <input type="checkbox"/> | <input type="checkbox"/> |
| Wild ruminants                      | <input type="checkbox"/>                                                                | <input type="checkbox"/>      | <input type="checkbox"/>          | <input type="checkbox"/>   | <input type="checkbox"/> | <input type="checkbox"/> |
| Wild ungulates other than ruminants | <input type="checkbox"/>                                                                | <input type="checkbox"/>      | <input type="checkbox"/>          | <input type="checkbox"/>   | <input type="checkbox"/> | <input type="checkbox"/> |
| Wild birds                          | <input type="checkbox"/>                                                                | <input type="checkbox"/>      | <input type="checkbox"/>          | <input type="checkbox"/>   | <input type="checkbox"/> | <input type="checkbox"/> |

**27. If you selected "other" in the previous question, please specify here below**

---

**28. Is your country collecting ANY OTHER RELEVANT INDICATOR not mentioned above? If yes, could you specify? \***

---



---



---



---



---

## Rift Valley Fever virus

29. Is Rift Valley Fever virus a pathogen of relevance for your country? (A relevant pathogen could be an endemic or epidemic pathogen in the country, or an emerging pathogen not yet identified in the country) \*

Mark only one oval.

- ☐ YES
- ☐ NO Skip to question 44.
- ☐ Other: \_\_\_\_\_

## Rift Valley Fever virus

30. Is your country collecting data on ANIMAL DISEASE OCCURRENCE and at which level? (DISEASE OCCURRENCE: Notified cases / outbreaks (according to National case definition) per year) \*

Tick all that apply.

|                                     | No                       | YES (national aggregated) | YES (regional aggregated) | YES (local or GPS)       | Other                    | I don't know             |
|-------------------------------------|--------------------------|---------------------------|---------------------------|--------------------------|--------------------------|--------------------------|
| Cattle                              | <input type="checkbox"/> | <input type="checkbox"/>  | <input type="checkbox"/>  | <input type="checkbox"/> | <input type="checkbox"/> | <input type="checkbox"/> |
| Goats                               | <input type="checkbox"/> | <input type="checkbox"/>  | <input type="checkbox"/>  | <input type="checkbox"/> | <input type="checkbox"/> | <input type="checkbox"/> |
| Sheep                               | <input type="checkbox"/> | <input type="checkbox"/>  | <input type="checkbox"/>  | <input type="checkbox"/> | <input type="checkbox"/> | <input type="checkbox"/> |
| Camels                              | <input type="checkbox"/> | <input type="checkbox"/>  | <input type="checkbox"/>  | <input type="checkbox"/> | <input type="checkbox"/> | <input type="checkbox"/> |
| Wild ruminants                      | <input type="checkbox"/> | <input type="checkbox"/>  | <input type="checkbox"/>  | <input type="checkbox"/> | <input type="checkbox"/> | <input type="checkbox"/> |
| Wild ungulates other than ruminants | <input type="checkbox"/> | <input type="checkbox"/>  | <input type="checkbox"/>  | <input type="checkbox"/> | <input type="checkbox"/> | <input type="checkbox"/> |

31. If you selected "other" in the previous question, please specify here below

\_\_\_\_\_

32. If yes, where are the collected data on ANIMAL DISEASE OCCURRENCE stored?

Tick all that apply.

|                                     | Digitalized national database interoperable or integrated with other sectors' databases | Digitalized national database | Non digitalized national database | Local or regional database | Other                    | I don't know             |
|-------------------------------------|-----------------------------------------------------------------------------------------|-------------------------------|-----------------------------------|----------------------------|--------------------------|--------------------------|
| Cattle                              | <input type="checkbox"/>                                                                | <input type="checkbox"/>      | <input type="checkbox"/>          | <input type="checkbox"/>   | <input type="checkbox"/> | <input type="checkbox"/> |
| Goats                               | <input type="checkbox"/>                                                                | <input type="checkbox"/>      | <input type="checkbox"/>          | <input type="checkbox"/>   | <input type="checkbox"/> | <input type="checkbox"/> |
| Sheep                               | <input type="checkbox"/>                                                                | <input type="checkbox"/>      | <input type="checkbox"/>          | <input type="checkbox"/>   | <input type="checkbox"/> | <input type="checkbox"/> |
| Camels                              | <input type="checkbox"/>                                                                | <input type="checkbox"/>      | <input type="checkbox"/>          | <input type="checkbox"/>   | <input type="checkbox"/> | <input type="checkbox"/> |
| Wild ruminants                      | <input type="checkbox"/>                                                                | <input type="checkbox"/>      | <input type="checkbox"/>          | <input type="checkbox"/>   | <input type="checkbox"/> | <input type="checkbox"/> |
| Wild ungulates other than ruminants | <input type="checkbox"/>                                                                | <input type="checkbox"/>      | <input type="checkbox"/>          | <input type="checkbox"/>   | <input type="checkbox"/> | <input type="checkbox"/> |

33. If you selected "other" in the previous question, please specify here below

\_\_\_\_\_

**34. Is your country collecting data on ANIMAL DISEASE SERO-PREVALENCE and at which level? (DISEASE SERO-PREVALENCE: Animals with detected antibodies / tested animals)**

\*

*Tick all that apply.*

|                                     | No                       | YES (national aggregated) | YES (regional aggregated) | YES (local or GPS)       | Other                    | I don't know             |
|-------------------------------------|--------------------------|---------------------------|---------------------------|--------------------------|--------------------------|--------------------------|
| Cattle                              | <input type="checkbox"/> | <input type="checkbox"/>  | <input type="checkbox"/>  | <input type="checkbox"/> | <input type="checkbox"/> | <input type="checkbox"/> |
| Goats                               | <input type="checkbox"/> | <input type="checkbox"/>  | <input type="checkbox"/>  | <input type="checkbox"/> | <input type="checkbox"/> | <input type="checkbox"/> |
| Sheep                               | <input type="checkbox"/> | <input type="checkbox"/>  | <input type="checkbox"/>  | <input type="checkbox"/> | <input type="checkbox"/> | <input type="checkbox"/> |
| Camels                              | <input type="checkbox"/> | <input type="checkbox"/>  | <input type="checkbox"/>  | <input type="checkbox"/> | <input type="checkbox"/> | <input type="checkbox"/> |
| Wild ruminants                      | <input type="checkbox"/> | <input type="checkbox"/>  | <input type="checkbox"/>  | <input type="checkbox"/> | <input type="checkbox"/> | <input type="checkbox"/> |
| Wild ungulates other than ruminants | <input type="checkbox"/> | <input type="checkbox"/>  | <input type="checkbox"/>  | <input type="checkbox"/> | <input type="checkbox"/> | <input type="checkbox"/> |

**35. If you selected "other" in the previous question, please specify here below**

---

**36. If yes, where are the collected data on ANIMAL DISEASE SERO-PREVALENCE stored?**

*Tick all that apply.*

|                                     | Digitalized national database interoperable or integrated with other sectors' databases | Digitalized national database | Non digitalized national database | Local or regional database | Other                    | I don't know             |
|-------------------------------------|-----------------------------------------------------------------------------------------|-------------------------------|-----------------------------------|----------------------------|--------------------------|--------------------------|
| Cattle                              | <input type="checkbox"/>                                                                | <input type="checkbox"/>      | <input type="checkbox"/>          | <input type="checkbox"/>   | <input type="checkbox"/> | <input type="checkbox"/> |
| Goats                               | <input type="checkbox"/>                                                                | <input type="checkbox"/>      | <input type="checkbox"/>          | <input type="checkbox"/>   | <input type="checkbox"/> | <input type="checkbox"/> |
| Sheep                               | <input type="checkbox"/>                                                                | <input type="checkbox"/>      | <input type="checkbox"/>          | <input type="checkbox"/>   | <input type="checkbox"/> | <input type="checkbox"/> |
| Camels                              | <input type="checkbox"/>                                                                | <input type="checkbox"/>      | <input type="checkbox"/>          | <input type="checkbox"/>   | <input type="checkbox"/> | <input type="checkbox"/> |
| Wild ruminants                      | <input type="checkbox"/>                                                                | <input type="checkbox"/>      | <input type="checkbox"/>          | <input type="checkbox"/>   | <input type="checkbox"/> | <input type="checkbox"/> |
| Wild ungulates other than ruminants | <input type="checkbox"/>                                                                | <input type="checkbox"/>      | <input type="checkbox"/>          | <input type="checkbox"/>   | <input type="checkbox"/> | <input type="checkbox"/> |

**37. If you selected "other" in the previous question, please specify here below**

---

**38. Is your country ROUTINELY VACCINATING animals for the disease? \***

*Mark only one oval per row.*

|                                     | Yes                   | Not at all            | Not routinely / others | I don't know          |
|-------------------------------------|-----------------------|-----------------------|------------------------|-----------------------|
| Cattle                              | <input type="radio"/> | <input type="radio"/> | <input type="radio"/>  | <input type="radio"/> |
| Goats                               | <input type="radio"/> | <input type="radio"/> | <input type="radio"/>  | <input type="radio"/> |
| Sheep                               | <input type="radio"/> | <input type="radio"/> | <input type="radio"/>  | <input type="radio"/> |
| Camels                              | <input type="radio"/> | <input type="radio"/> | <input type="radio"/>  | <input type="radio"/> |
| Wild ruminants                      | <input type="radio"/> | <input type="radio"/> | <input type="radio"/>  | <input type="radio"/> |
| Wild ungulates other than ruminants | <input type="radio"/> | <input type="radio"/> | <input type="radio"/>  | <input type="radio"/> |

**39. If you selected "others" in the previous question, please specify here below**

---



**40. If yes, is your country collecting data on NUMBER OF VACCINATED ANIMALS PER YEAR OR VACCINATION COVERAGE and at which level?**

*Tick all that apply.*

|                                     | No                       | YES (national aggregated) | YES (regional aggregated) | YES (local or GPS)       | Other                    | I don't know             |
|-------------------------------------|--------------------------|---------------------------|---------------------------|--------------------------|--------------------------|--------------------------|
| Cattle                              | <input type="checkbox"/> | <input type="checkbox"/>  | <input type="checkbox"/>  | <input type="checkbox"/> | <input type="checkbox"/> | <input type="checkbox"/> |
| Goats                               | <input type="checkbox"/> | <input type="checkbox"/>  | <input type="checkbox"/>  | <input type="checkbox"/> | <input type="checkbox"/> | <input type="checkbox"/> |
| Sheep                               | <input type="checkbox"/> | <input type="checkbox"/>  | <input type="checkbox"/>  | <input type="checkbox"/> | <input type="checkbox"/> | <input type="checkbox"/> |
| Camels                              | <input type="checkbox"/> | <input type="checkbox"/>  | <input type="checkbox"/>  | <input type="checkbox"/> | <input type="checkbox"/> | <input type="checkbox"/> |
| Wild ruminants                      | <input type="checkbox"/> | <input type="checkbox"/>  | <input type="checkbox"/>  | <input type="checkbox"/> | <input type="checkbox"/> | <input type="checkbox"/> |
| Wild ungulates other than ruminants | <input type="checkbox"/> | <input type="checkbox"/>  | <input type="checkbox"/>  | <input type="checkbox"/> | <input type="checkbox"/> | <input type="checkbox"/> |

**41. If you selected "other" in the previous question, please specify here below**

---

**42. If yes, where are the collected data on ANIMAL VACCINATION stored?**

*Tick all that apply.*

|                                     | Digitalized national database interoperable or integrated with other sectors' databases | Digitalized national database | Non digitalized national database | Local or regional database | Other                    | I don't know             |
|-------------------------------------|-----------------------------------------------------------------------------------------|-------------------------------|-----------------------------------|----------------------------|--------------------------|--------------------------|
| Cattle                              | <input type="checkbox"/>                                                                | <input type="checkbox"/>      | <input type="checkbox"/>          | <input type="checkbox"/>   | <input type="checkbox"/> | <input type="checkbox"/> |
| Goats                               | <input type="checkbox"/>                                                                | <input type="checkbox"/>      | <input type="checkbox"/>          | <input type="checkbox"/>   | <input type="checkbox"/> | <input type="checkbox"/> |
| Sheep                               | <input type="checkbox"/>                                                                | <input type="checkbox"/>      | <input type="checkbox"/>          | <input type="checkbox"/>   | <input type="checkbox"/> | <input type="checkbox"/> |
| Camels                              | <input type="checkbox"/>                                                                | <input type="checkbox"/>      | <input type="checkbox"/>          | <input type="checkbox"/>   | <input type="checkbox"/> | <input type="checkbox"/> |
| Wild ruminants                      | <input type="checkbox"/>                                                                | <input type="checkbox"/>      | <input type="checkbox"/>          | <input type="checkbox"/>   | <input type="checkbox"/> | <input type="checkbox"/> |
| Wild ungulates other than ruminants | <input type="checkbox"/>                                                                | <input type="checkbox"/>      | <input type="checkbox"/>          | <input type="checkbox"/>   | <input type="checkbox"/> | <input type="checkbox"/> |

**43. If you selected "other" in the previous question, please specify here below**

---

**44. Is your country collecting ANY OTHER RELEVANT INDICATOR not mentioned above? If yes, could you specify? \***

---



---



---



---



---

## West Nile fever virus

45. Is West Nile Fever virus a pathogen of relevance for your country? (A relevant pathogen could be an endemic or epidemic pathogen in the country, or an emerging pathogen not yet identified in the country) \*

Mark only one oval.

- ☐ YES
- ☐ NO Skip to question 60.
- ☐ Other: \_\_\_\_\_

## West Nile fever virus

46. Is your country collecting data on ANIMAL DISEASE OCCURRENCE and at which level? (DISEASE OCCURRENCE: Notified cases / outbreaks (according to National case definition) per year) \*

Tick all that apply.

|            | No                       | YES (national aggregated) | YES (regional aggregated) | YES (local or GPS)       | Other                    | I don't know             |
|------------|--------------------------|---------------------------|---------------------------|--------------------------|--------------------------|--------------------------|
| Equids     | <input type="checkbox"/> | <input type="checkbox"/>  | <input type="checkbox"/>  | <input type="checkbox"/> | <input type="checkbox"/> | <input type="checkbox"/> |
| Wild birds | <input type="checkbox"/> | <input type="checkbox"/>  | <input type="checkbox"/>  | <input type="checkbox"/> | <input type="checkbox"/> | <input type="checkbox"/> |

47. If you selected "other" in the previous question, please specify here below

\_\_\_\_\_

48. If yes, where are the collected data on ANIMAL DISEASE OCCURRENCE stored?

Tick all that apply.

|            | Digitalized national database interoperable or integrated with other sectors' databases | Digitalized national database | Non digitalized national database | Local or regional database | Other                    | I don't know             |
|------------|-----------------------------------------------------------------------------------------|-------------------------------|-----------------------------------|----------------------------|--------------------------|--------------------------|
| Equids     | <input type="checkbox"/>                                                                | <input type="checkbox"/>      | <input type="checkbox"/>          | <input type="checkbox"/>   | <input type="checkbox"/> | <input type="checkbox"/> |
| Wild birds | <input type="checkbox"/>                                                                | <input type="checkbox"/>      | <input type="checkbox"/>          | <input type="checkbox"/>   | <input type="checkbox"/> | <input type="checkbox"/> |

49. If you selected "other" in the previous question, please specify here below

\_\_\_\_\_

50. Is your country collecting data on ANIMAL DISEASE SERO-PREVALENCE and at which level? (DISEASE SERO-PREVALENCE: Animals with detected antibodies / tested animals) \*

Tick all that apply.

|            | No                       | YES (national aggregated) | YES (regional aggregated) | YES (local or GPS)       | Other                    | I don't know             |
|------------|--------------------------|---------------------------|---------------------------|--------------------------|--------------------------|--------------------------|
| Equids     | <input type="checkbox"/> | <input type="checkbox"/>  | <input type="checkbox"/>  | <input type="checkbox"/> | <input type="checkbox"/> | <input type="checkbox"/> |
| Wild birds | <input type="checkbox"/> | <input type="checkbox"/>  | <input type="checkbox"/>  | <input type="checkbox"/> | <input type="checkbox"/> | <input type="checkbox"/> |

51. If you selected "other" in the previous question, please specify here below

\_\_\_\_\_

**52. If yes, where are the collected data on ANIMAL DISEASE SERO-PREVALENCE stored?***Tick all that apply.*

|            | Digitalized national database interoperable or integrated with other sectors' databases | Digitalized national database | Non digitalized national database | Local or regional database | Other                    | I don't know             |
|------------|-----------------------------------------------------------------------------------------|-------------------------------|-----------------------------------|----------------------------|--------------------------|--------------------------|
| Equids     | <input type="checkbox"/>                                                                | <input type="checkbox"/>      | <input type="checkbox"/>          | <input type="checkbox"/>   | <input type="checkbox"/> | <input type="checkbox"/> |
| Wild birds | <input type="checkbox"/>                                                                | <input type="checkbox"/>      | <input type="checkbox"/>          | <input type="checkbox"/>   | <input type="checkbox"/> | <input type="checkbox"/> |

**53. If you selected "other" in the previous question, please specify here below**


---

**54. Is your country ROUTINELY VACCINATING animals for the disease? \****Mark only one oval per row.*

|        | Yes                   | Not at all            | Not routinely / others | I don't know          |
|--------|-----------------------|-----------------------|------------------------|-----------------------|
| Equids | <input type="radio"/> | <input type="radio"/> | <input type="radio"/>  | <input type="radio"/> |
| Others | <input type="radio"/> | <input type="radio"/> | <input type="radio"/>  | <input type="radio"/> |

**55. If you selected "others" in the previous question, please specify here below**


---

**56. If yes, is your country collecting data on NUMBER OF VACCINATED ANIMALS PER YEAR OR VACCINATION COVERAGE and at which level?***Tick all that apply.*

|        | No                       | YES (national aggregated) | YES (regional aggregated) | YES (local or GPS)       | Other                    | I don't know             |
|--------|--------------------------|---------------------------|---------------------------|--------------------------|--------------------------|--------------------------|
| Equids | <input type="checkbox"/> | <input type="checkbox"/>  | <input type="checkbox"/>  | <input type="checkbox"/> | <input type="checkbox"/> | <input type="checkbox"/> |
| Others | <input type="checkbox"/> | <input type="checkbox"/>  | <input type="checkbox"/>  | <input type="checkbox"/> | <input type="checkbox"/> | <input type="checkbox"/> |

**57. If you selected "other" in the previous question, please specify here below**


---

**58. If yes, where are the collected data on ANIMAL VACCINATION stored?***Tick all that apply.*

|        | Digitalized national database interoperable or integrated with other sectors' databases | Digitalized national database | Non digitalized national database | Local or regional database | Other                    | I don't know             |
|--------|-----------------------------------------------------------------------------------------|-------------------------------|-----------------------------------|----------------------------|--------------------------|--------------------------|
| Equids | <input type="checkbox"/>                                                                | <input type="checkbox"/>      | <input type="checkbox"/>          | <input type="checkbox"/>   | <input type="checkbox"/> | <input type="checkbox"/> |
| Others | <input type="checkbox"/>                                                                | <input type="checkbox"/>      | <input type="checkbox"/>          | <input type="checkbox"/>   | <input type="checkbox"/> | <input type="checkbox"/> |

**59. If you selected "other" in the previous question, please specify here below**


---

60. Is your country collecting ANY OTHER RELEVANT INDICATOR not mentioned above? If yes, could you specify? \*

---

---

---

---

---

## Climate & Environment

This section is collecting information on indicators regarding Climate & Environment regardless of the pathogens

## Climate & Environment

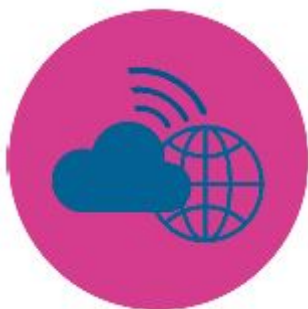

61. Is your country collecting data on TEMPERATURE and at which level? \*

*Tick all that apply.*

- ☐ NO
- ☐ YES - National aggregated
- ☐ YES - Regional aggregated
- ☐ YES - Local or GPS
- ☐ I don't know
- ☐ Other: \_\_\_\_\_

62. If yes, which specific data on TEMPERATURE is your country collecting?

*Tick all that apply.*

- ☐ Maximum temperature
- ☐ Annual average of mean temperature
- ☐ I don't know
- ☐ Other: \_\_\_\_\_

**63. If yes, where are the collected data on TEMPERATURE stored?***Tick all that apply.*

- ☐ Digitalized national database interoperable or integrated with other sectors' databases
- ☐ Digitalized national database
- ☐ Non digitalized national database
- ☐ Local or regional database
- ☐ I don't know
- ☐ Other: \_\_\_\_\_

**64. Is your country collecting data on PRECIPITATIONS and at which level? \****Tick all that apply.*

- ☐ NO
- ☐ YES - National aggregated
- ☐ YES - Regional aggregated
- ☐ YES - Local or GPS
- ☐ I don't know
- ☐ Other: \_\_\_\_\_

**65. If yes, which specific data on PRECIPITATIONS is your country collecting?***Tick all that apply.*

- ☐ Monthly precipitation
- ☐ Weekly precipitation
- ☐ I don't know
- ☐ Other: \_\_\_\_\_

**66. If yes, where are the collected data on PRECIPITATIONS stored?***Tick all that apply.*

- ☐ Digitalized national database interoperable or integrated with other sectors' databases
- ☐ Digitalized national database
- ☐ Non digitalized national database
- ☐ Local or regional database
- ☐ I don't know
- ☐ Other: \_\_\_\_\_

**67. Where are the METEOROLOGICAL STATIONS of your country? Please specify place and region. If you don't know, please answer "I don't know". \***

---

---

---

---

---

**68. Which variables are routinely recorded in your meteorological stations?***Tick all that apply.*

- ☐ Temperature
- ☐ Precipitations
- ☐ I don't know
- ☐ Other: \_\_\_\_\_

**69. Is your country collecting data on VEGETATION and at which level? \****Tick all that apply.*

- ☐ NO
- ☐ YES - National aggregated
- ☐ YES - Regional aggregated
- ☐ YES - Local or GPS
- ☐ I don't know
- ☐ Other: \_\_\_\_\_

**70. If yes, which specific data on VEGETATION is your country collecting?**

---

**71. If yes, where are the collected data on VEGETATION stored?***Tick all that apply.*

- ☐ Digitalized national database interoperable or integrated with other sectors' databases
- ☐ Digitalized national database
- ☐ Non digitalized national database
- ☐ Local or regional database
- ☐ I don't know
- ☐ Other: \_\_\_\_\_

**72. Is your country collecting data on LAND USE and at which level? \****Tick all that apply.*

- ☐ NO
- ☐ YES - National aggregated
- ☐ YES - Regional aggregated
- ☐ YES - Local or GPS
- ☐ I don't know
- ☐ Other: \_\_\_\_\_

**73. If yes, which specific data on LAND USE is your country collecting?***Tick all that apply.*

- ☐ Forest, mixed vegetation, cropland or urban land uses
- ☐ I don't know
- ☐ Other: \_\_\_\_\_

**74. If yes, where are the collected data on LAND USE stored?***Tick all that apply.*

- ☐ Digitalized national database interoperable or integrated with other sectors' databases
- ☐ Digitalized national database
- ☐ Non digitalized national database
- ☐ Local or regional database
- ☐ I don't know
- ☐ Other: \_\_\_\_\_

**75. Is your country collecting data on LAND COVER and at which level? \****Tick all that apply.*

- ☐ NO
- ☐ YES - National aggregated
- ☐ YES - Regional aggregated
- ☐ YES - Local or GPS
- ☐ I don't know
- ☐ Other: \_\_\_\_\_

**76. If yes, which specific data on LAND COVER is your country collecting?***Tick all that apply.*

- ☐ Artificial, cultivated, herbaceous cover, tree cover, mosaic and water
- ☐ I don't know
- ☐ Other: \_\_\_\_\_

**77. If yes, where are the collected data on LAND COVER stored?***Tick all that apply.*

- ☐ Digitalized national database interoperable or integrated with other sectors' databases
- ☐ Digitalized national database
- ☐ Non digitalized national database
- ☐ Local or regional database
- ☐ I don't know
- ☐ Other: \_\_\_\_\_

**78. Is your country collecting data on SOIL TYPE and at which level? \****Tick all that apply.*

- ☐ NO
- ☐ YES - National aggregated
- ☐ YES - Regional aggregated
- ☐ YES - Local or GPS
- ☐ I don't know
- ☐ Other: \_\_\_\_\_

**79. If yes, which specific data on SOIL TYPE is your country collecting?**

---

**80. If yes, where are the collected data on SOIL TYPE stored?**

*Tick all that apply.*

- ☐ Digitalized national database interoperable or integrated with other sectors' databases
- ☐ Digitalized national database
- ☐ Non digitalized national database
- ☐ Local or regional database
- ☐ I don't know
- ☐ Other: \_\_\_\_\_

**81. The above mentioned indicators are collected by which INSTITUTION / INSTITUTIONS? If you don't know, please answer "I don't know". \***

---

---

---

---

---

**82. Has your office access to any GLOBAL PUBLIC DATASET related to Climate & Environment? \***

*Mark only one oval.*

- ☐ Yes
- ☐ No
- ☐ I don't know
- ☐ Other: \_\_\_\_\_

**83. If yes, which one/ones? Are you using it/them for which purpose?**

---

---

---

---

---

**84. Is your country collecting ANY OTHER RELEVANT INDICATOR not mentioned above? If yes, could you specify? \***

---

---

---

---

---



## Conclusions

85. Please feel free to put any comment, suggestion or remark here below

---

---

---

---

---

**Thank you very much for your time and consideration!**

---

**MediLabSecure 2 is a project funded by the EC DEVCO  
(IFS/2018/402-247)**

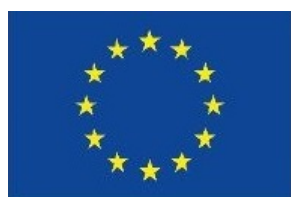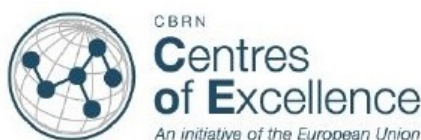

**Please be kindly informed that the information you have provided with this questionnaire will be shared and disseminated only in aggregated form with the information provided by all the other MLS Countries involved in this survey.**

---

☐ Send me a copy of my responses.

---

Powered by  
 Google Forms
